# Supplementary material
Source: PubMed Central journal article supplement (PMC4766970)

## Supporting Information

### Design, Synthesis, and Cardioprotective Effects of *N*-Mercapto-Based Hydrogen

#### Sulfide Donors

Yu Zhao,<sup>†,||</sup> Chuntao Yang,<sup>‡,||</sup> Chelsea Organ,<sup>§</sup> Zhen Li,<sup>§</sup> Shashi Bhushan,<sup>§</sup> Hiro Otsuka,<sup>§</sup>  
Armando Pacheco,<sup>†</sup> Jianming Kang,<sup>†</sup> Hector C. Aguilar,<sup>¶</sup> David J. Lefer,<sup>§</sup> and Ming  
Xian<sup>\*,†</sup>

<sup>†</sup> Department of Chemistry, Washington State University, Pullman, Washington, 99164,  
United States

<sup>‡</sup> Department of Physiology, Guangzhou Medical University, Guangzhou 511436, China

<sup>§</sup> Cardiovascular Center of Excellence, Louisiana State University Health Science Center,  
New Orleans, LA, 70112, United States

<sup>¶</sup> Paul G. Allen School for Global Animal Health, Washington State University, Pullman,  
WA 99164, United States

<sup>||</sup> These authors contributed equally in this work.

#### Table of Contents

|                                           |         |
|-------------------------------------------|---------|
| Donor synthesis and characterization data | S2-S13  |
| NMR Spectra of donors                     | S14-S35 |

**Materials and Methods:** All solvents were reagent grade. Tetrahydrofuran (THF) was freshly distilled from sodium/benzophenone under argon. Reactions were magnetically stirred and monitored by thin layer chromatography (TLC) with 0.25 mm pre-coated silica gel plates. Flash chromatography was performed with silica gel 60 (particle size 0.040-0.062 mm). Yields refer to chromatographically and spectroscopically pure compounds, unless otherwise stated. Proton and carbon-13 NMR spectra were recorded on a 300 MHz spectrometer. Chemical shifts are reported relative to chloroform ( $\delta$ 7.26) for  $^1\text{H}$  NMR and chloroform ( $\delta$ 77.0) for  $^{13}\text{C}$  NMR.

## Experimental Procedures and Compound Characterization Data

### Preparation of *N*-(acylthio)amide-based $\text{H}_2\text{S}$ donors

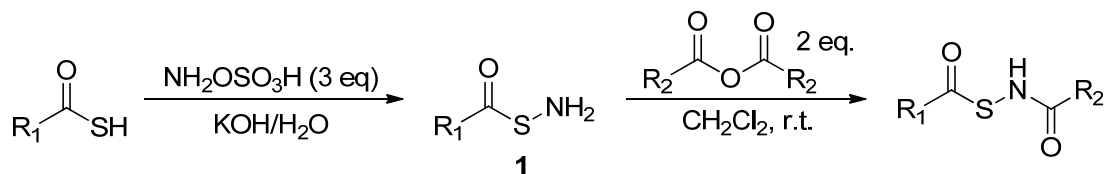

*N*-(acylthio)amide-based donors were synthesized from the corresponding thiocarboxylic acids. Briefly, to a stirred solution of  $\text{KOH}$  (280 mg, 5 mmol) in water (15 mL) was added thiocarboxylic acid (1 mmol) and hydroxylamine-*O*-sulfonic acid (339 mg, 3 mmol). The solution was stirred for 5 min at rt and then extracted with  $\text{CH}_2\text{Cl}_2$  (X3). The organic layers were combined and concentrated to afford *S*-acylthiohydroxylamine (**1**) as white solid. This material was used for next step without further purification.

The intermediate **1** was dissolved in  $\text{CH}_2\text{Cl}_2$ , followed by the addition of the corresponding carboxylic anhydride (2 mmol). The resultant solution was stirred

overnight at rt. The crude product was obtained upon removal of the solvent and purified by recrystallization in hexane.

Please refer to ref. S1 for the characterization data of donors **NSHD-1** – **NSHD-4** and **NSHD-6** – **NSHD-12**

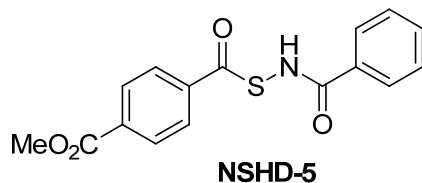

**NSHD-5** was prepared from 4-(methoxycarbonyl)benzothioic *S*-acid and benzoic anhydride. m. p. 184-186 °C <sup>1</sup>H NMR (300 MHz, DMSO-*d*<sub>6</sub>) δ 10.18 (s, 1H), 8.06 (m, 6H), 7.59 (m, 3H), 3.89 (s, 3H); <sup>13</sup>C NMR (75 MHz, DMSO-*d*<sub>6</sub>) δ 192.3, 168.5, 165.9, 137.8, 135.1, 133.5, 133.2, 130.9, 129.3, 128.7, 127.7, 53.4; IR (thin film) cm<sup>-1</sup> 3159, 1717, 1703, 1647, 1455, 1437, 1404, 1274, 1209, 1108; mass spectrum (ESI/MS) *m/z* [M+H]<sup>+</sup> 316.1; calcd for C<sub>16</sub>H<sub>14</sub>NO<sub>4</sub>S 316.1; overall yield: 62 % (2 steps).

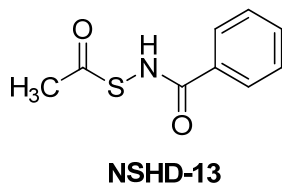

**NSHD-13** was prepared from thioacetic acid and benzoic anhydride. m. p. 83-86 °C <sup>1</sup>H NMR (300 MHz, CDCl<sub>3</sub>) δ 7.85 (d, *J* = 8.7 Hz, 2H), 7.54 (t, *J* = 7.5 Hz, 1H), 7.44 (t, *J* = 7.8 Hz, 2H), 7.37 (m, 1H), 2.32 (s, 3H); <sup>13</sup>C NMR (75 MHz, CDCl<sub>3</sub>) δ 195.6, 168.4, 133.0, 132.8, 129.0, 128.0, 26.5; IR (thin film) cm<sup>-1</sup> 3261, 1723, 1692, 1664, 1599, 1581, 1452, 1422, 1262, 1099; mass spectrum (ESI/MS) *m/z* 195.9 [M+H]<sup>+</sup>; calcd for C<sub>9</sub>H<sub>10</sub>NO<sub>2</sub>S 196.0; overall yield: 61 % (2 steps).

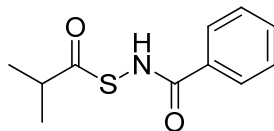

**NSHD-14**

**NSHD-14** was prepared from 2-methylpropanethioic *S*-acid and benzoic anhydride. m. p. 103-106 °C  $^1\text{H}$  NMR (300 MHz,  $\text{CDCl}_3$ )  $\delta$  7.86 (m, 2H), 7.47 (m, 3H), 7.24 (s, 1H), 2.79 (m, 1H), 1.25 (s, 6H);  $^{13}\text{C}$  NMR (75 MHz,  $\text{CDCl}_3$ )  $\delta$  203.2, 168.4, 132.7, 130.4, 128.9, 127.9, 40.0, 19.0; IR (thin film)  $\text{cm}^{-1}$  3263, 2996, 2927, 1717, 1655, 1561, 1541, 1498, 1452, 1420, 1267, 1248, 970; mass spectrum (ESI/MS)  $m/z$  223.9  $[\text{M}+\text{H}]^+$ ; calcd for  $\text{C}_{11}\text{H}_{14}\text{NO}_2\text{S}$  224.1; overall yield: 67 % (2 steps).

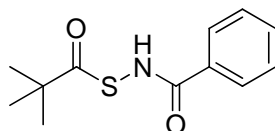

**NSHD-15**

**NSHD-15** was prepared from 2,2-dimethylpropanethioic *S*-acid and benzoic anhydride. m. p. 102-103 °C  $^1\text{H}$  NMR (300 MHz,  $\text{CDCl}_3$ )  $\delta$  7.87 (d,  $J = 7.2$  Hz, 2H), 7.53 (t,  $J = 7.8$  Hz, 1H), 7.43 (t,  $J = 8.1$  Hz, 2H), 7.02 (s, 1H), 1.30 (s, 9H);  $^{13}\text{C}$  NMR (75 MHz,  $\text{CDCl}_3$ )  $\delta$  205.6, 168.6, 133.4, 132.6, 128.9, 127.9, 45.5, 26.8; IR (thin film)  $\text{cm}^{-1}$  3255, 2966, 2927, 1709, 1662, 1650, 1560, 1541, 1451, 1420, 1365, 1267, 1248, 935; mass spectrum (ESI/MS)  $m/z$  238.0  $[\text{M}+\text{H}]^+$ ; calcd for  $\text{C}_{12}\text{H}_{16}\text{NO}_2\text{S}$  238.1; overall yield: 62 % (2 steps).

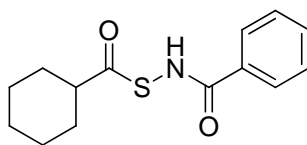

**NSHD-16**

**NSHD-16** was prepared from cyclohexanecarbothioic *S*-acid and benzoic anhydride. m. p. 147-148 °C  $^1\text{H}$  NMR (300 MHz,  $\text{CDCl}_3$ )  $\delta$  7.85 (d,  $J = 8.4$  Hz, 2H), 7.53 (t,  $J = 7.2$  Hz, 1H), 7.43 (t,  $J = 7.8$  Hz, 2H), 7.11 (s, 1H), 2.54 (m, 1H), 1.95 (m, 2H), 1.81 (m, 2H), 1.67 (m, 1H), 1.52 (m, 2H), 1.29 (m, 3H);  $^{13}\text{C}$  NMR (75 MHz,  $\text{CDCl}_3$ )  $\delta$  202.0, 168.3, 133.2, 132.6, 128.9, 127.9, 49.4, 29.1, 25.5; IR (thin film)  $\text{cm}^{-1}$  3279, 2927, 2857, 1705, 1654, 1552, 1537, 1451, 1416, 966; mass spectrum (ESI/MS)  $m/z$  264.1  $[\text{M}+\text{H}]^+$ ; calcd for  $\text{C}_{14}\text{H}_{18}\text{NO}_2\text{S}$  264.1; overall yield: 76 % (2 steps).

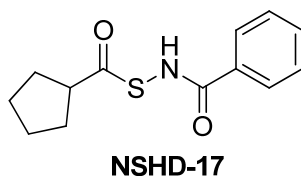

**NSHD-17** was prepared from cyclopentanecarbothioic *S*-acid and benzoic anhydride. m. p. 126-128 °C  $^1\text{H}$  NMR (300 MHz,  $\text{CDCl}_3$ )  $\delta$  7.86 (d,  $J = 8.7$  Hz, 2H), 7.54 (t,  $J = 7.5$  Hz, 1H), 7.44 (t,  $J = 7.8$  Hz, 2H), 7.09 (s, 1H), 3.01 (quin,  $J = 7.5$  Hz, 1H), 1.92 (m, 4H), 1.69 (m, 4H);  $^{13}\text{C}$  NMR (75 MHz,  $\text{CDCl}_3$ )  $\delta$  202.2, 168.3, 133.2, 132.7, 129.0, 127.9, 49.6, 30.5, 26.2; IR (thin film)  $\text{cm}^{-1}$  3286, 2950, 2872, 1712, 1701, 1654, 1559, 1541, 1508, 1456, 1419, 994; mass spectrum (ESI/MS)  $m/z$  272.0  $[\text{M}+\text{Na}]^+$ ; calcd for  $\text{C}_{13}\text{H}_{15}\text{NNaO}_2\text{S}$  272.1; overall yield: 69 % (2 steps).

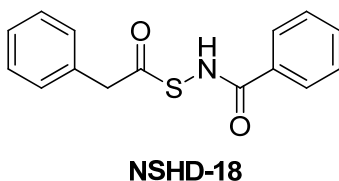

**NSHD-18** was prepared from 2-phenylethanethioic *S*-acid and benzoic anhydride. m. p. 96-98 °C  $^1\text{H}$  NMR (300 MHz,  $\text{CDCl}_3$ )  $\delta$  7.82 (d,  $J = 7.2$  Hz, 2H), 7.75 (s, 1H), 7.48 (t,  $J =$

7.2 Hz, 1H), 7.36 (d,  $J = 7.8$  Hz, 2H), 7.28 (m, 5H), 3.76 (s, 2H);  $^{13}\text{C}$  NMR (75 MHz,  $\text{CDCl}_3$ )  $\delta$  197.5, 168.7, 132.9, 132.7, 132.0, 130.1, 129.1, 128.9, 128.1, 128.0, 46.7; IR (thin film)  $\text{cm}^{-1}$  3292, 1705, 1662, 1556, 1541, 1451, 1416, 1353, 1158, 989; mass spectrum (ESI/MS)  $m/z$  272.0  $[\text{M}+\text{H}]^+$ ; calcd for  $\text{C}_{15}\text{H}_{14}\text{NO}_2\text{S}$  272.1; overall yield: 71 % (2 steps).

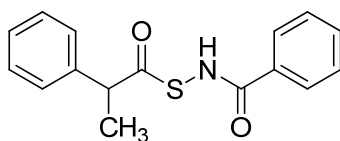

**NSHD-19**

**NSHD-19** was prepared from 2-phenylpropanethioic *S*-acid and benzoic anhydride. m. p. 121-122 °C  $^1\text{H}$  NMR (300 MHz,  $\text{CDCl}_3$ )  $\delta$  7.82 (d,  $J = 7.2$  Hz, 2H), 7.54 (t,  $J = 7.2$  Hz, 1H), 7.44 (t,  $J = 7.8$  Hz, 2H), 7.36 (s, 5H), 6.91 (s, 1H), 3.92 (q,  $J = 7.2$  Hz, 1H), 1.60 (d,  $J = 7.2$  Hz, 3H);  $^{13}\text{C}$  NMR (75 MHz,  $\text{CDCl}_3$ )  $\delta$  200.6, 168.2, 138.1, 133.2, 132.7, 129.2, 129.0, 128.6, 128.4, 127.8, 51.2, 18.1; IR (thin film)  $\text{cm}^{-1}$  3420, 1700, 1661, 1499, 1453, 1423, 1264, 947; mass spectrum (ESI/MS)  $m/z$  286.0  $[\text{M}+\text{H}]^+$ ; calcd for  $\text{C}_{16}\text{H}_{16}\text{NO}_2\text{S}$  286.1; overall yield: 61 % (2 steps).

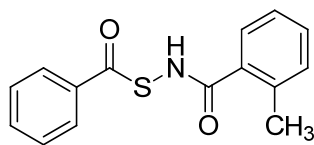

**NSHD-20**

**NSHD-20** was prepared from thiobenzoic acid and 2-methylbenzoic anhydride. m. p. 106-108 °C  $^1\text{H}$  NMR (300 MHz,  $\text{CDCl}_3$ )  $\delta$  7.93 (d,  $J = 7.5$  Hz, 2H), 7.65 (t,  $J = 7.5$  Hz, 2H), 7.51 (t,  $J = 7.8$  Hz, 2H), 7.39 (t,  $J = 8.4$  Hz, 1H), 7.28 (d,  $J = 7.8$  Hz, 2H), 6.68 (s, 1H), 2.54 (s, 3H);  $^{13}\text{C}$  NMR (75 MHz,  $\text{CDCl}_3$ )  $\delta$  190.8, 171.1, 137.4, 134.8, 134.6, 134.4,

131.5, 131.1, 129.3, 127.5, 127.3, 126.1, 20.1; IR (thin film)  $\text{cm}^{-1}$  3262, 1697, 1670, 1576, 1557, 1541, 1420, 1208, 902; mass spectrum (ESI/MS)  $m/z$  272.0  $[\text{M}+\text{H}]^+$ ; calcd for  $\text{C}_{15}\text{H}_{14}\text{NO}_2\text{S}$  272.1; overall yield: 75 % (2 steps).

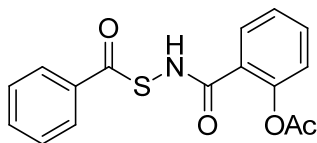

**NSHD-21**

**NSHD-21** was prepared from thiobenzoic acid and 2-(methoxycarbonyl)benzoic anhydride. m. p. 134-135  $^{\circ}\text{C}$   $^1\text{H}$  NMR (300 MHz,  $\text{CDCl}_3$ )  $\delta$  7.93 (m, 3H), 7.65 (m, 1H), 7.54 (m, 3H), 7.37 (m, 2H), 7.20 (d,  $J = 9.0$  Hz, 1H), 2.44 (s, 3H);  $^{13}\text{C}$  NMR (75 MHz,  $\text{CDCl}_3$ )  $\delta$  190.2, 169.6, 166.6, 148.4, 134.7, 134.3, 133.1, 130.9, 129.3, 127.3, 127.0, 126.7, 123.8, 21.5; IR (thin film)  $\text{cm}^{-1}$  3266, 1763, 1689, 1656, 1607, 1458, 1444, 1371, 1284, 1194; mass spectrum (ESI/MS)  $m/z$  338.0  $[\text{M}+\text{Na}]^+$ ; calcd for  $\text{C}_{16}\text{H}_{13}\text{NNaO}_4\text{S}$  338.0; overall yield: 65 % (2 steps).

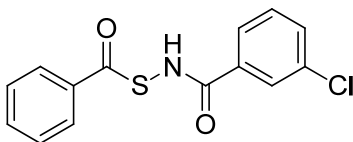

**NSHD-22**

**NSHD-22** was prepared from thiobenzoic acid and 3-chlorobenzoic anhydride. m. p. 96-98  $^{\circ}\text{C}$   $^1\text{H}$  NMR (300 MHz,  $\text{CDCl}_3$ )  $\delta$  8.08 (t,  $J = 1.8$  Hz, 1H), 7.99 (dt,  $J = 7.8, 1.2$  Hz, 1H), 7.81 (dt,  $J = 7.8, 1.2$  Hz, 1H), 7.65 (tt,  $J = 7.5, 1.2$  Hz, 1H), 7.52 (d,  $J = 8.1$  Hz, 3H), 7.43 (dd,  $J = 7.8, 2.4$  Hz, 2H), 7.13 (s, 1H);  $^{13}\text{C}$  NMR (75 MHz,  $\text{CDCl}_3$ )  $\delta$  190.8, 170.5, 134.7, 132.7, 130.4, 130.3, 130.0, 129.3, 128.3, 127.3, 126.0; IR (thin film)  $\text{cm}^{-1}$  3246,

1699, 1573, 1438, 1307, 1253, 1208, 900, 748; mass spectrum (ESI/MS)  $m/z$  291.9  $[M+H]^+$ ; calcd for  $C_{14}H_{11}ClNO_2S$  292.0; overall yield: 63 % (2 steps).

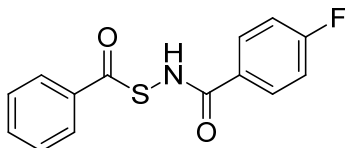

**NSHD-23**

**NSHD-23** was prepared from thiobenzoic acid and 4-fluorobenzoic anhydride. m. p. 111-114 °C  $^1H$  NMR (300 MHz,  $CDCl_3$ )  $\delta$  7.92 (m, 4H), 7.64 (t,  $J = 7.5$  Hz, 1H), 7.48 (t,  $J = 8.1$  Hz, 2H), 7.34 (s, 1H), 7.11 (t,  $J = 8.7$  Hz, 2H);  $^{13}C$  NMR (75 MHz,  $CDCl_3$ )  $\delta$  191.1, 167.2, 134.7, 134.3, 130.6, 130.5, 129.3, 127.3, 116.3, 116.0; IR (thin film)  $cm^{-1}$  3260, 1688, 1659, 1597, 1513, 1436, 1399, 1258, 1231, 1208, 1160, 1090; mass spectrum (ESI/MS)  $m/z$  276.0  $[M+H]^+$ ; calcd for  $C_{14}H_{11}FNO_2S$  276.0; overall yield: 73 % (2 steps).

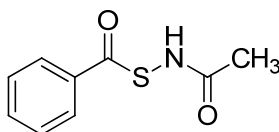

**NSHD-24**

**NSHD-24** was prepared from thiobenzoic acid and acetic anhydride. m. p. 114-115 °C  $^1H$  NMR (300 MHz,  $CDCl_3$ )  $\delta$  7.87 (d,  $J = 7.2$  Hz, 2H), 7.61 (t,  $J = 6.9$  Hz, 1H), 7.47 (t,  $J = 7.5$  Hz, 2H), 6.73 (s, 1H), 2.30 (s, 3H);  $^{13}C$  NMR (75 MHz,  $CDCl_3$ )  $\delta$  191.0, 171.7, 134.6, 134.3, 129.2, 127.3, 23.6; IR (thin film)  $cm^{-1}$  3221, 1699, 1664, 1597, 1553, 1446, 1251, 1206, 899; mass spectrum (ESI/MS)  $m/z$  413.2  $[2M+Na]^+$ ; calcd for  $C_{18}H_{18}N_2NaO_4S_2$  413.0; overall yield: 81 % (2 steps).



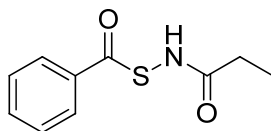

**NSHD-25**

**NSHD-25** was prepared from thiobenzoic acid and propionic anhydride. m. p. 132-133 °C  $^1\text{H}$  NMR (300 MHz,  $\text{CDCl}_3$ )  $\delta$  7.87 (d,  $J = 8.7$  Hz, 2H), 7.62 (t,  $J = 7.2$  Hz, 1H), 7.47 (t,  $J = 7.5$  Hz, 2H), 6.56 (s, 1H), 2.53 (q,  $J = 7.5$  Hz, 2H), 1.27 (t,  $J = 7.2$  Hz, 3H);  $^{13}\text{C}$  NMR (75 MHz,  $\text{CDCl}_3$ )  $\delta$  191.1, 175.3, 134.5, 129.2, 127.3, 30.2, 10.0; IR (thin film)  $\text{cm}^{-1}$  3193, 1694, 1667, 1447, 1208, 1188, 1175, 1072, 898, 775; mass spectrum (ESI/MS)  $m/z$  232.1  $[\text{M}+\text{Na}]^+$ ; calcd for  $\text{C}_{10}\text{H}_{11}\text{NNaO}_2\text{S}$  232.0; overall yield: 69 % (2 steps).

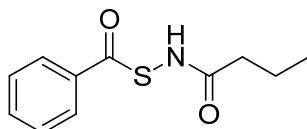

**NSHD-26**

**NSHD-26** was prepared from thiobenzoic acid and butyric anhydride. m. p. 77-78 °C  $^1\text{H}$  NMR (300 MHz,  $\text{CDCl}_3$ )  $\delta$  7.82 (d,  $J = 8.1$  Hz, 2H), 7.56 (t,  $J = 7.5$  Hz, 1H), 7.42 (t,  $J = 7.5$  Hz, 2H), 6.31 (s, 1H), 2.42 (t,  $J = 6.9$  Hz, 2H), 1.74 (q,  $J = 6.9$  Hz, 2H), 0.97 (t,  $J = 7.5$  Hz, 3H);  $^{13}\text{C}$  NMR (75 MHz,  $\text{CDCl}_3$ )  $\delta$  191.0, 174.5, 134.5, 129.2, 127.3, 38.9, 19.4, 13.9; IR (thin film)  $\text{cm}^{-1}$  3193, 1706, 1664, 1461, 1447, 1189, 1178, 1076, 896, 768; mass spectrum (ESI/MS)  $m/z$  223.9  $[\text{M}+\text{H}]^+$ ; calcd for  $\text{C}_{11}\text{H}_{14}\text{NO}_2\text{S}$  224.1; overall yield: 74 % (2 steps).

### Preparation of 1-(Benzoylthio)-3-phenylureas as $\text{H}_2\text{S}$ donors

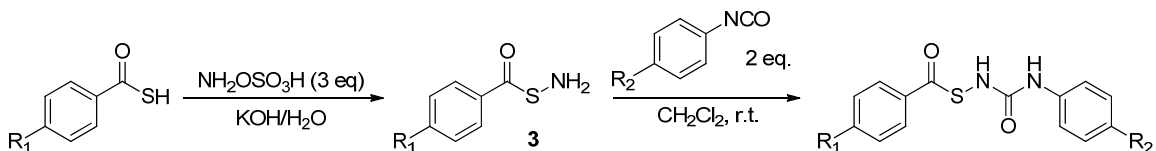

Intermediates **3** were synthesized following the procedure mentioned above. This intermediate was redissolved in  $\text{CH}_2\text{Cl}_2$ , followed by the addition of phenyl isocyanate derivatives (2 mmol). The resultant solution was allowed to stir overnight at rt. The products were obtained upon removal of the solvent and purified by recrystallization.

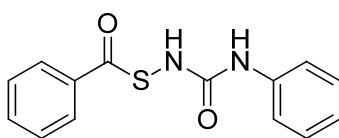

**NSHD-27**

**NSHD-27** was prepared from thiobenzoic acid and phenyl isocyanate. m. p. 184-186 °C  
 $^1\text{H}$  NMR (300 MHz,  $\text{DMSO}-d_6$ )  $\delta$  9.11 (s, 1H), 7.99 (s, 1H), 7.88 (d,  $J = 7.5$  Hz, 2H), 7.74 (t,  $J = 8.1$  Hz, 1H), 7.59 (t,  $J = 7.5$  Hz, 2H), 7.45 (d,  $J = 7.5$  Hz, 2H), 7.24 (t,  $J = 7.8$  Hz, 2H), 6.98 (t,  $J = 7.2$  Hz, 1H);  $^{13}\text{C}$  NMR (75 MHz,  $\text{DMSO}-d_6$ )  $\delta$  193.4, 155.0, 140.1, 135.2, 134.6, 130.1, 129.4, 127.2, 123.1, 119.3; IR (thin film)  $\text{cm}^{-1}$  3271, 1692, 1640, 1599, 1520, 1458, 1441, 1203, 1174, 910; mass spectrum (ESI/MS)  $m/z$  273.1  $[\text{M}+\text{H}]^+$ ; calcd for  $\text{C}_{14}\text{H}_{13}\text{N}_2\text{O}_2\text{S}$  273.1; overall yield: 77 % (2 steps).

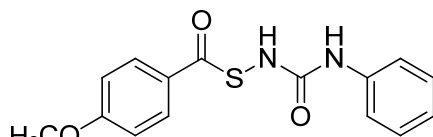

**NSHD-28**

**NSHD-28** was prepared from 4-methoxybenzothioic *S*-acid and phenyl isocyanate. m. p. 192-194 °C  $^1\text{H}$  NMR (300 MHz,  $\text{DMSO}-d_6$ )  $\delta$  9.07 (s, 1H), 7.88 (t,  $J = 9.0$  Hz, 3H), 7.45

(d,  $J = 9.0$  Hz, 2H), 7.26 (t,  $J = 9.0$  Hz, 2H), 7.11 (d,  $J = 9.0$  Hz, 2H), 6.97 (t,  $J = 9.0$  Hz, 1H), 3.85 (s, 3H);  $^{13}\text{C}$  NMR (75 MHz, DMSO- $d_6$ )  $\delta$  191.5, 164.7, 155.1, 140.1, 129.5, 129.4, 127.2, 123.0, 119.2, 115.4, 56.4; IR (thin film)  $\text{cm}^{-1}$  3262, 1678, 1638, 1603, 1557, 1464, 1264, 1228, 1177, 1027, 903; mass spectrum (ESI/MS)  $m/z$  325.1  $[\text{M}+\text{Na}]^+$ ; calcd for  $\text{C}_{15}\text{H}_{14}\text{N}_2\text{NaO}_3\text{S}$  325.1; overall yield: 70 % (2 steps)

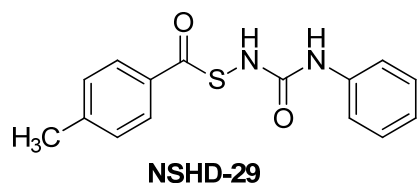

**NSHD-29** was prepared from 4-methylbenzothioic *S*-acid and phenyl isocyanate. m. p. 204-206 °C  $^1\text{H}$  NMR (300 MHz, DMSO- $d_6$ )  $\delta$  9.10 (s, 1H), 7.94 (s, 1H), 7.78 (d,  $J = 9.0$  Hz, 2H), 7.42 (dd,  $J = 18.0, 6.0$  Hz, 4H), 7.26 (t,  $J = 9.0$  Hz, 2H), 6.98 (t,  $J = 9.0$  Hz, 1H), 2.38 (s, 3H);  $^{13}\text{C}$  NMR (75 MHz, DMSO- $d_6$ )  $\delta$  192.7, 155.1, 145.8, 140.1, 132.0, 130.6, 129.4, 127.2, 123.0, 119.3, 22.0; IR (thin film)  $\text{cm}^{-1}$  3295, 1697, 1630, 1595, 1548, 1469, 1295, 1201, 1173, 896; mass spectrum (ESI/MS)  $m/z$  309.1  $[\text{M}+\text{Na}]^+$ ; calcd for  $\text{C}_{15}\text{H}_{14}\text{N}_2\text{NaO}_2\text{S}$  309.1; overall yield: 74 % (2 steps)

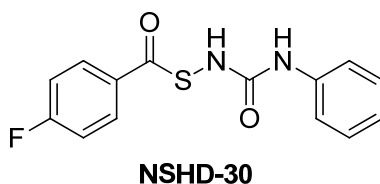

**NSHD-30** was prepared from 4-fluorobenzothioic *S*-acid and phenyl isocyanate. m. p. 194-195 °C  $^1\text{H}$  NMR (300 MHz, DMSO- $d_6$ )  $\delta$  9.12 (s, 1H), 7.99 (m, 3H), 7.43 (m, 4H), 7.27 (t,  $J = 9.0$  Hz, 2H), 6.98 (t,  $J = 9.0$  Hz, 1H);  $^{13}\text{C}$  NMR (75 MHz, DMSO- $d_6$ )  $\delta$  192.0, 164.3, 154.8, 139.8, 130.9, 130.3, 129.4, 123.3, 119.3, 117.1; IR (thin film)  $\text{cm}^{-1}$  3288,

3223, 1639, 1598, 1539, 1201, 1157, 902, 840; mass spectrum (ESI/MS)  $m/z$  313.0  $[M+Na]^+$ ; calcd for  $C_{14}H_{11}FN_2NaO_2S$  313.0; overall yield: 64 % (2 steps).

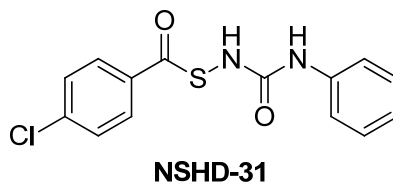

**NSHD-31** was prepared from 4-chlorobenzothioic *S*-acid and phenyl isocyanate. m. p. 197-199 °C  $^1H$  NMR (300 MHz,  $DMSO-d_6$ )  $\delta$  9.13 (s, 1H), 8.03 (s, 3H), 7.91 (dt,  $J = 9.0, 3.0$  Hz, 2H), 7.67 (dt,  $J = 9.0, 3.0$  Hz, 2H), 7.45 (d,  $J = 9.0$  Hz, 2H), 7.27 (t,  $J = 9.0$  Hz, 2H), 6.99 (tt,  $J = 9.0, 3.0$  Hz, 1H);  $^{13}C$  NMR (75 MHz,  $DMSO-d_6$ )  $\delta$  192.5, 154.9, 140.0, 139.9, 133.2, 130.3, 129.4, 129.1, 123.1, 119.3 IR (thin film)  $cm^{-1}$  3268, 1694, 1647, 1602, 1464, 1398, 1205, 1177, 1094, 902; mass spectrum (ESI/MS)  $m/z$  307.0  $[M+H]^+$ ; calcd for  $C_{14}H_{12}ClN_2O_2S$  307.0; overall yield: 66 % (2 steps).

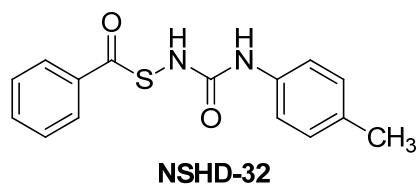

**NSHD-32** was prepared from benzothioic *S*-acid and 4-methylphenyl isocyanate. m. p. 207-208 °C  $^1H$  NMR (300 MHz,  $DMSO-d_6$ )  $\delta$  9.00 (s, 1H), 7.91 (m, 3H), 7.74 (t,  $J = 9.0$ , Hz, 1H), 7.59 (t,  $J = 9.0$  Hz, 2H), 7.34 (d,  $J = 9.0$  Hz, 2H), 7.07 (d,  $J = 9.0$ , Hz, 2H), 2.23 (s, 3H);  $^{13}C$  NMR (75 MHz,  $DMSO-d_6$ )  $\delta$  193.5, 155.0, 137.5, 135.2, 134.6, 131.9, 130.1, 129.8, 127.2, 119.4, 21.0; IR (thin film)  $cm^{-1}$  3240, 1693, 1641, 1592, 1537, 1149, 1211, 1183, 1051, 903; mass spectrum (ESI/MS)  $m/z$  287.1  $[M+H]^+$ ; calcd for  $C_{15}H_{15}N_2O_2S$  287.1; overall yield: 61 % (2 steps).

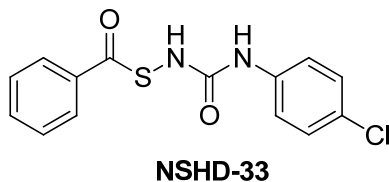

**NSHD-33** was prepared from benzothioic *S*-acid and 4-chlorophenyl isocyanate. m. p. 204-206 °C  $^1\text{H}$  NMR (300 MHz,  $\text{DMSO-}d_6$ )  $\delta$  9.28 (s, 1H), 8.09 (s, 1H), 7.88 (d,  $J = 9.0$  Hz, 2H), 7.73 (tt,  $J = 9.0, 3.0$  Hz, 1H), 7.59 (t,  $J = 9.0$  Hz, 2H), 7.50 (dt,  $J = 9.0, 3.0$  Hz, 2H), 7.32 (dt,  $J = 9.0, 3.0$  Hz, 2H);  $^{13}\text{C}$  NMR (75 MHz,  $\text{DMSO-}d_6$ )  $\delta$  193.2, 155.0, 139.1, 135.2, 134.5, 130.2, 129.3, 127.2, 126.6, 120.9; IR (thin film)  $\text{cm}^{-1}$  3281, 1687, 1660, 1610, 1549, 1460, 1447, 1203, 898; mass spectrum (ESI/MS)  $m/z$  307.0  $[\text{M}+\text{H}]^+$ ; calcd for  $\text{C}_{14}\text{H}_{12}\text{ClN}_2\text{O}_2\text{S}$  307.0; overall yield: 65 % (2 steps).

References:

S1. Zhao, Y.; Wang, H.; Xian, M. *J. Am. Chem. Soc.* **2011**, *133*, 15-17.

$^1\text{H}$  NMR (300 MHz,  $\text{DMSO-}d_6$ ) spectrum of **NSHD-5**

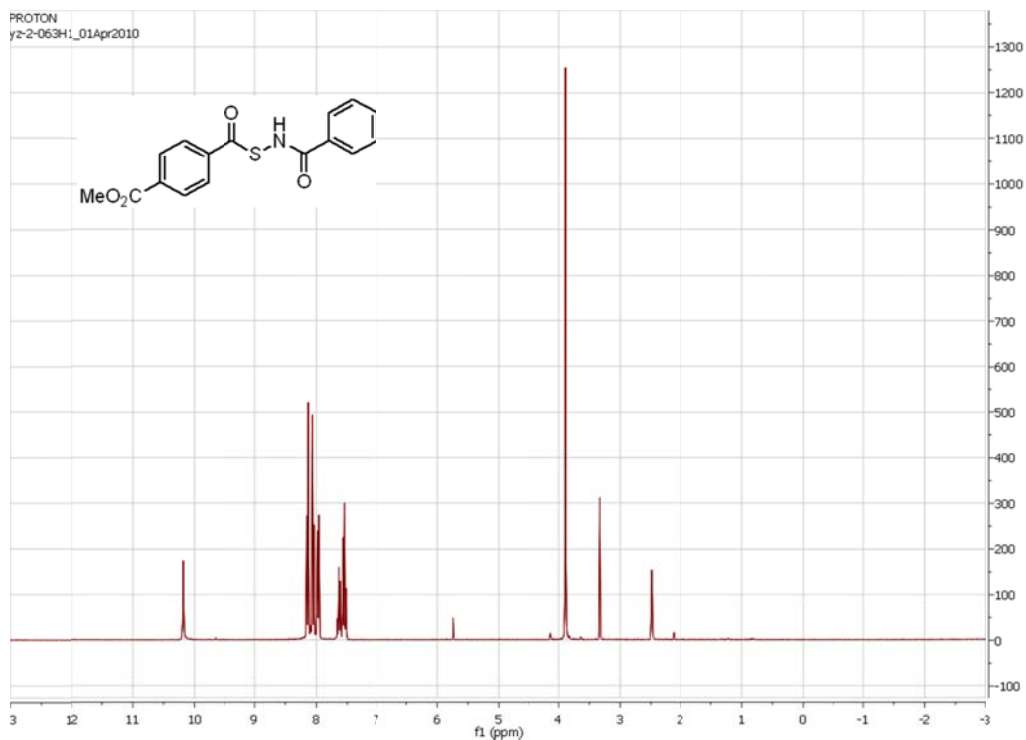

$^{13}\text{C}$  NMR (75 MHz,  $\text{DMSO-}d_6$ ) spectrum of **NSHD-5**

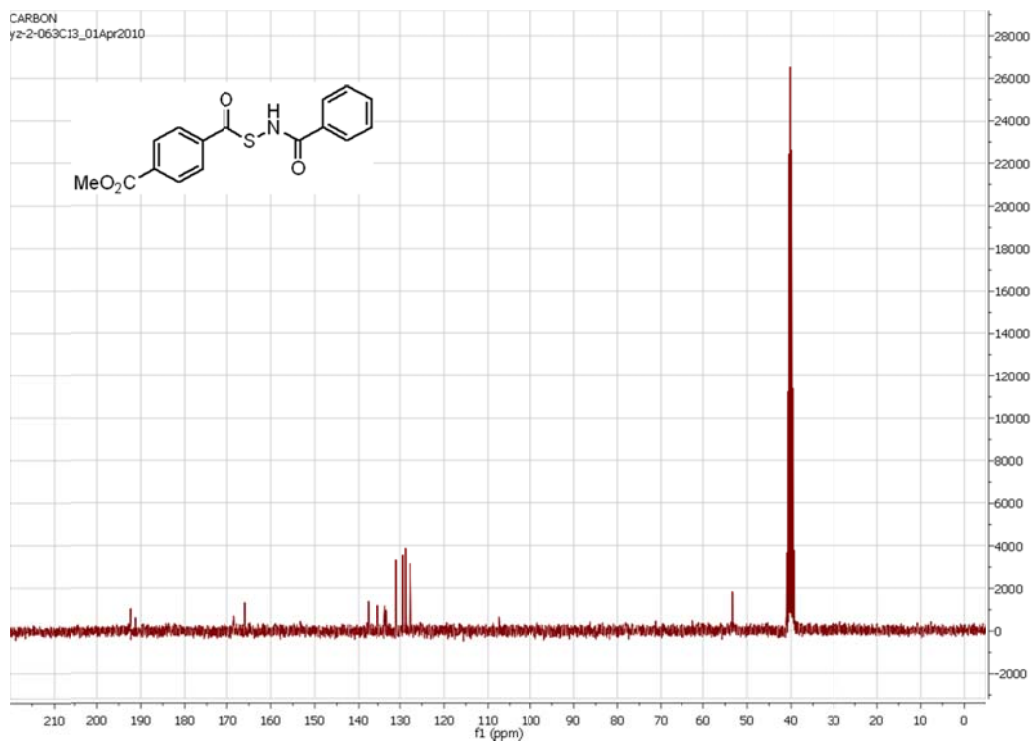

$^1\text{H}$  NMR (300 MHz,  $\text{CDCl}_3$ ) spectrum of **NSHD-13**

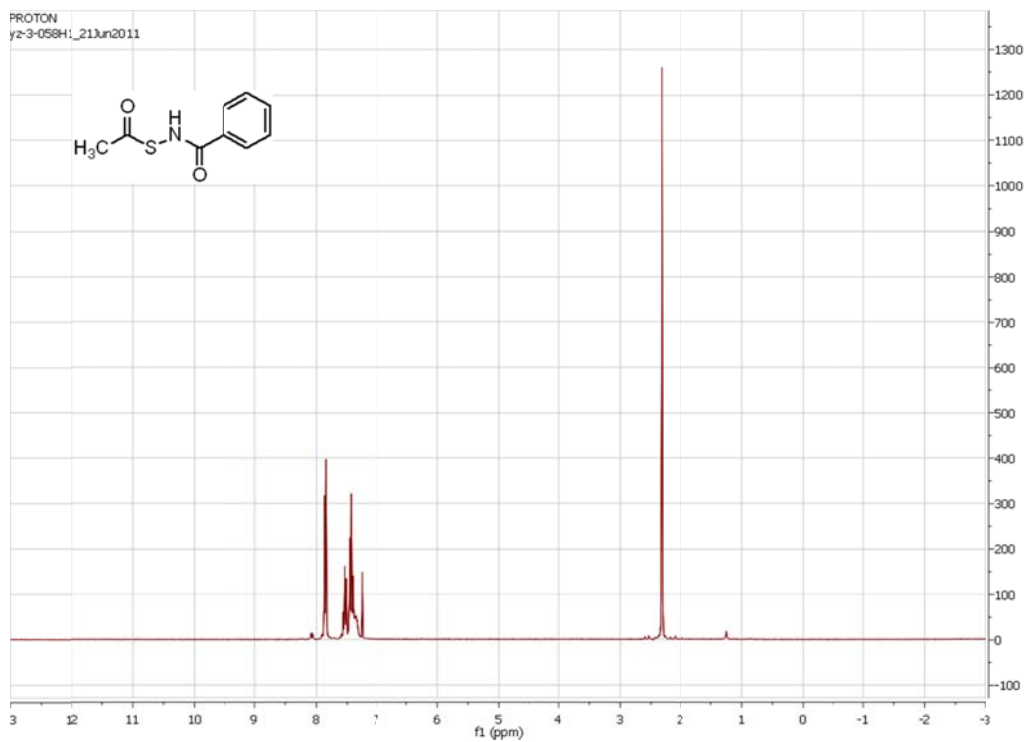

$^{13}\text{C}$  NMR (75 MHz,  $\text{CDCl}_3$ ) spectrum of **NSHD-13**

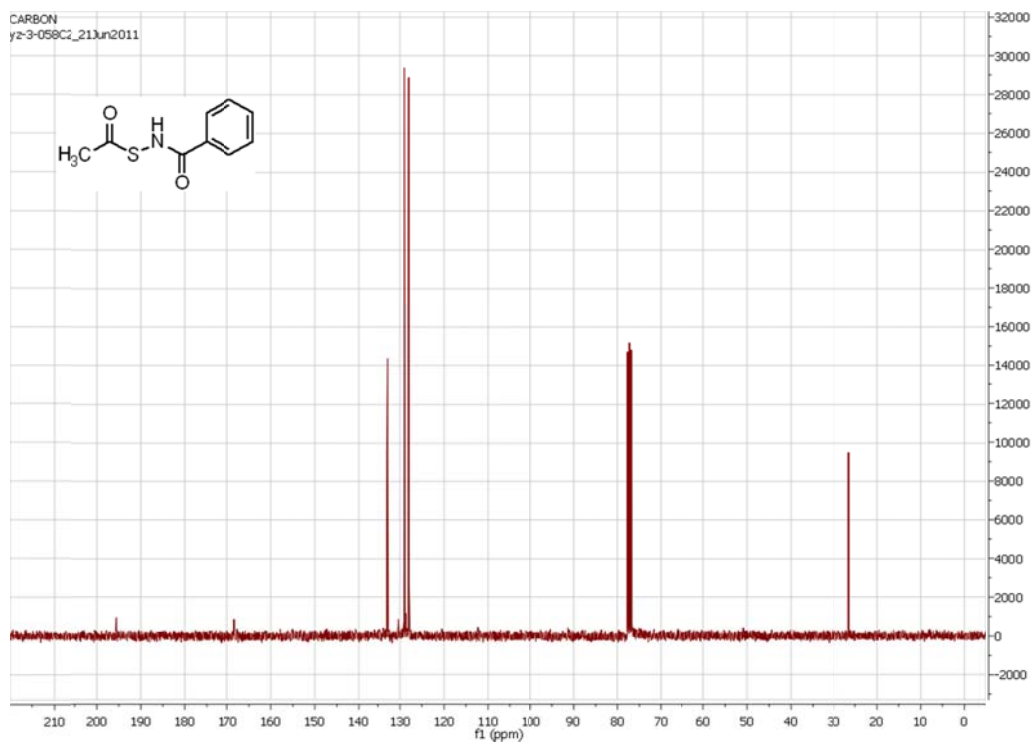

$^1\text{H}$  NMR (300 MHz,  $\text{CDCl}_3$ ) spectrum of **NSHD-14**

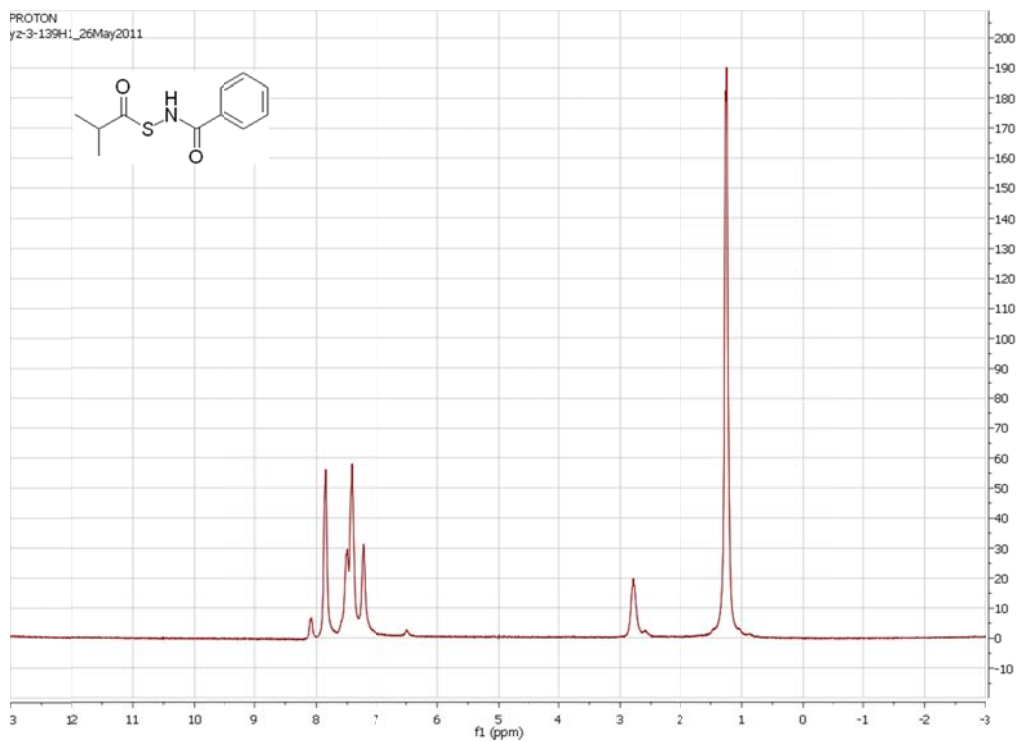

$^{13}\text{C}$  NMR (75 MHz,  $\text{CDCl}_3$ ) spectrum of **NSHD-14**

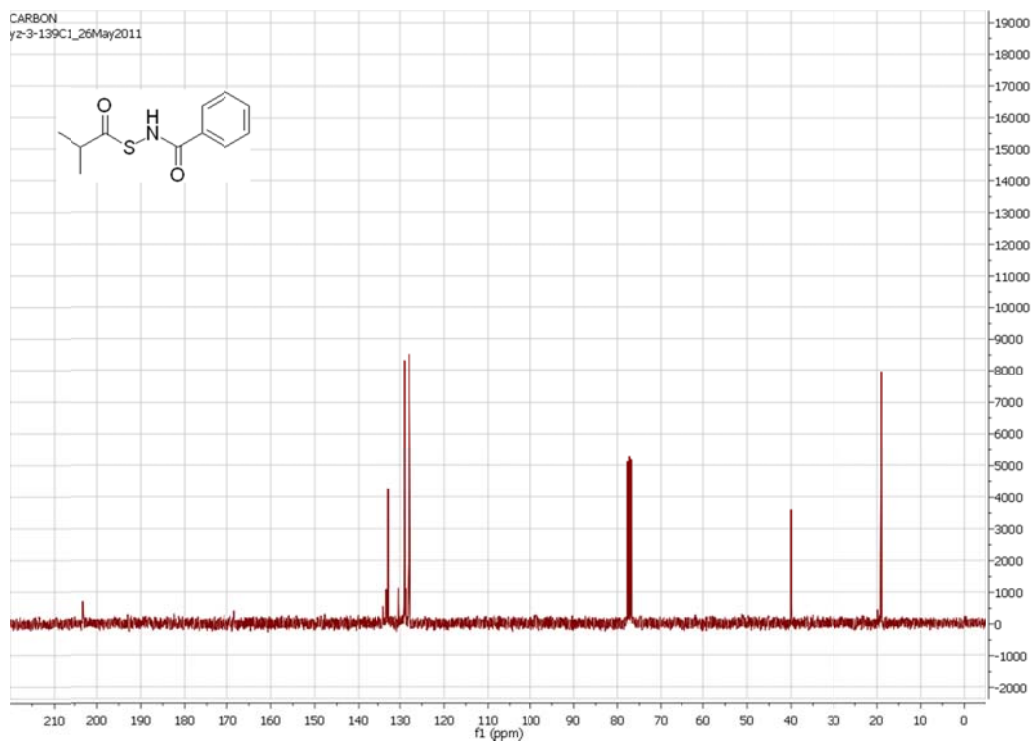



$^1\text{H}$  NMR (300 MHz,  $\text{CDCl}_3$ ) spectrum of **NSHD-15**

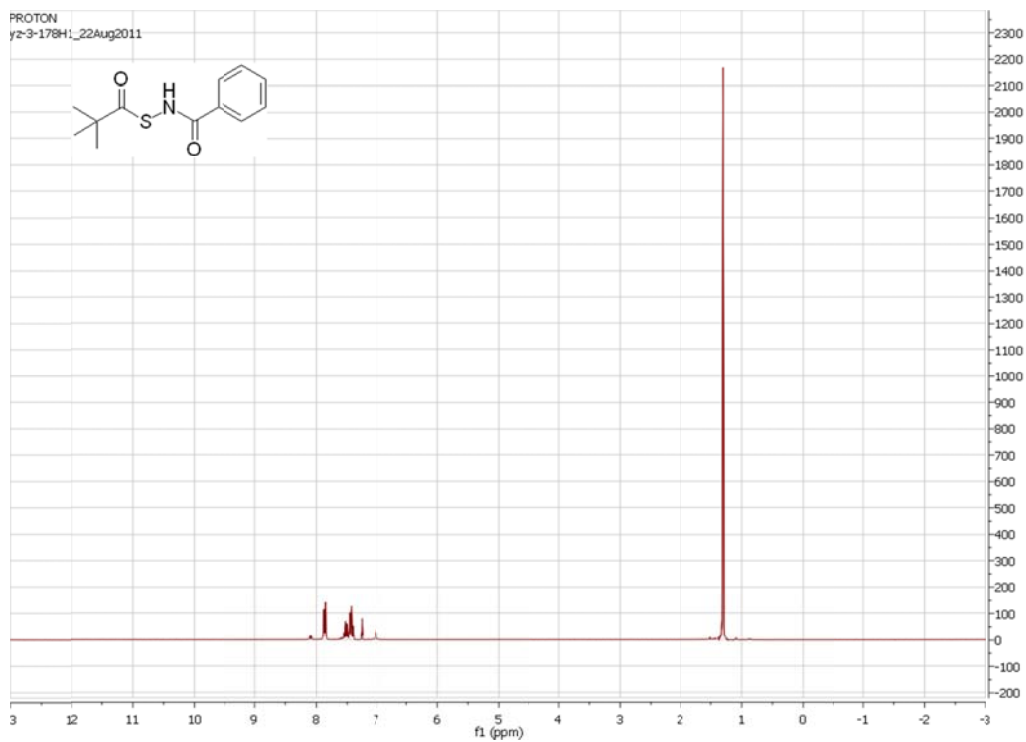

$^{13}\text{C}$  NMR (75 MHz,  $\text{CDCl}_3$ ) spectrum of **NSHD-15**

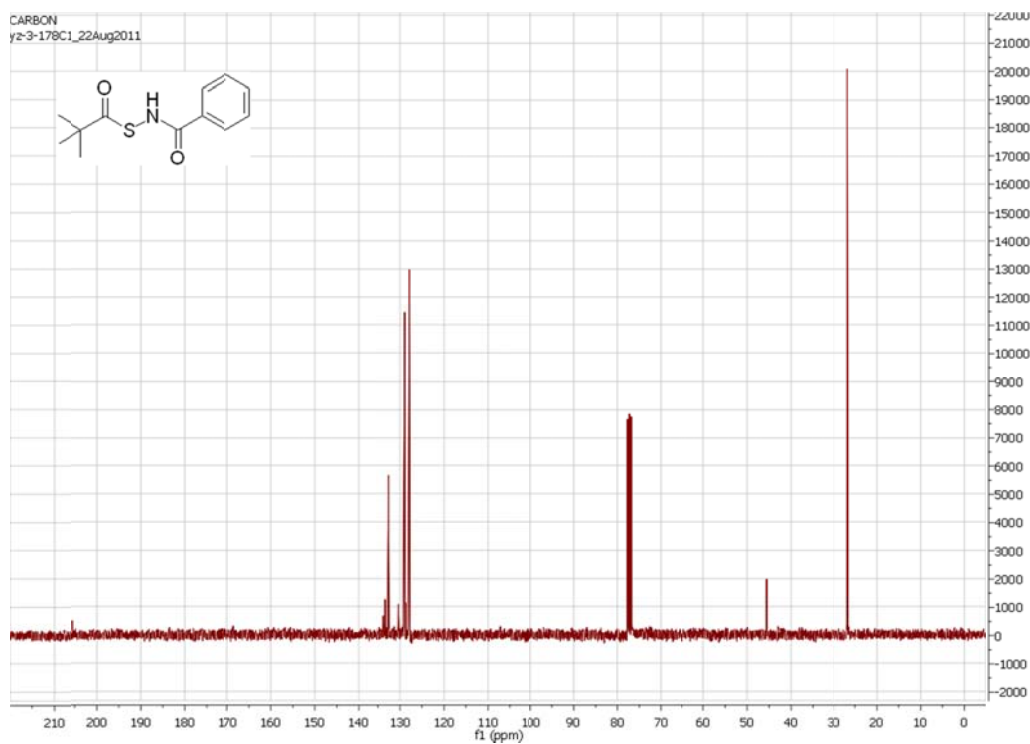

$^1\text{H}$  NMR (300 MHz,  $\text{CDCl}_3$ ) spectrum of **NSHD-16**

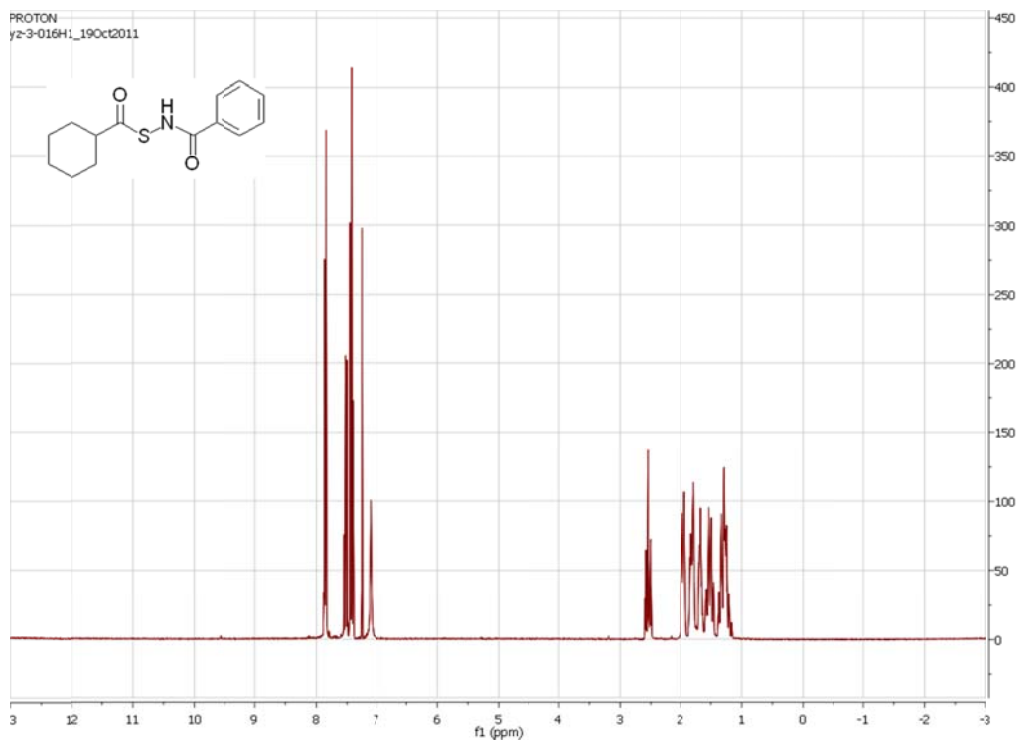

$^{13}\text{C}$  NMR (75 MHz,  $\text{CDCl}_3$ ) spectrum of **NSHD-16**

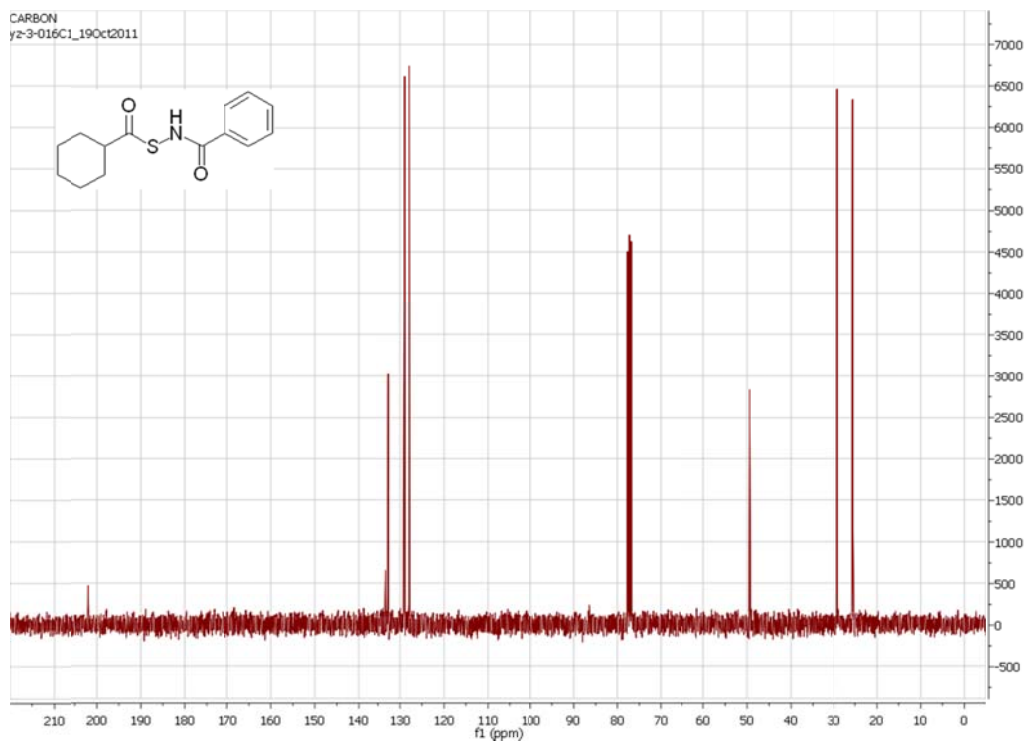

$^1\text{H}$  NMR (300 MHz,  $\text{CDCl}_3$ ) spectrum of **NSHD-17**

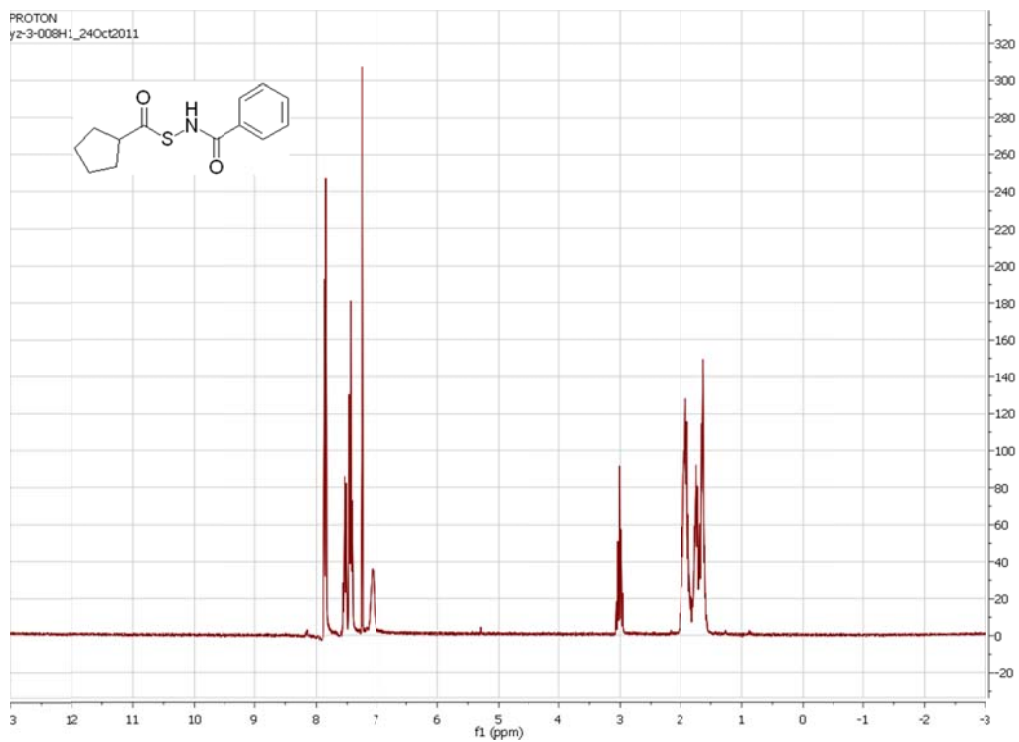

$^{13}\text{C}$  NMR (75 MHz,  $\text{CDCl}_3$ ) spectrum of **NSHD-17**

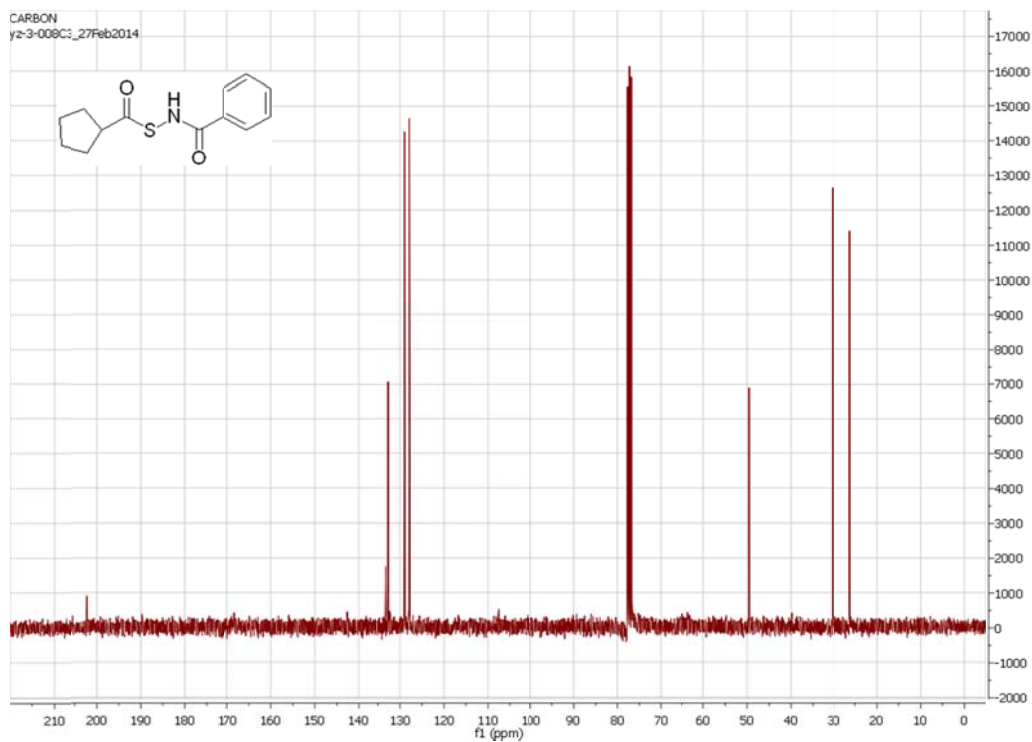

$^1\text{H}$  NMR (300 MHz,  $\text{CDCl}_3$ ) spectrum of **NSHD-18**

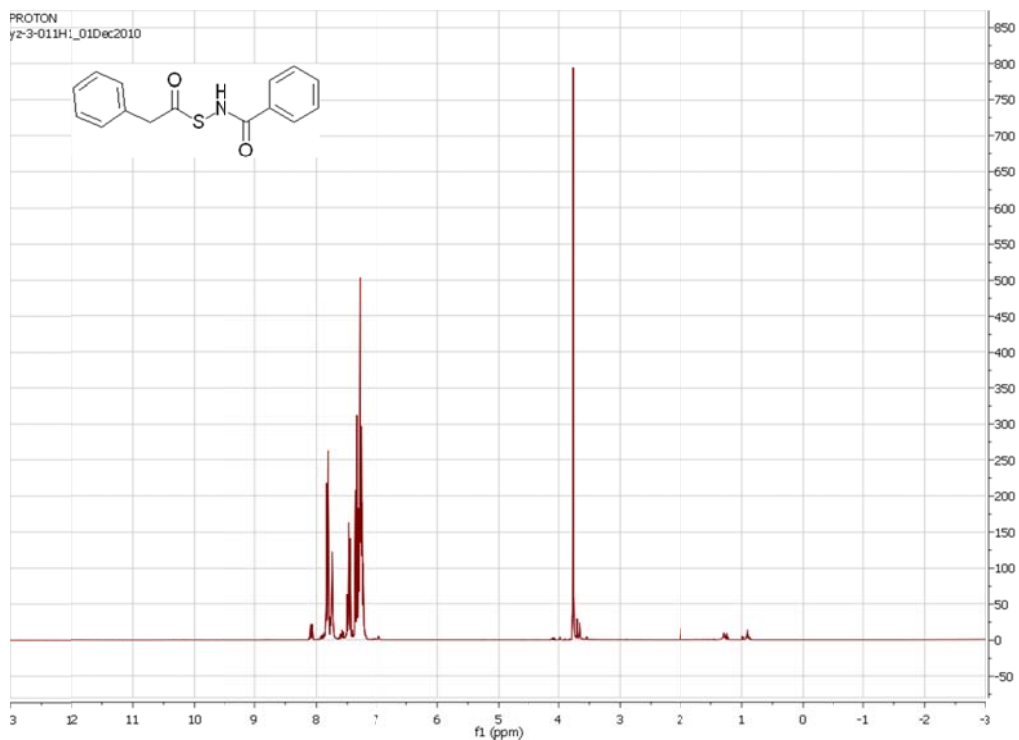

$^{13}\text{C}$  NMR (75 MHz,  $\text{CDCl}_3$ ) spectrum of **NSHD-18**

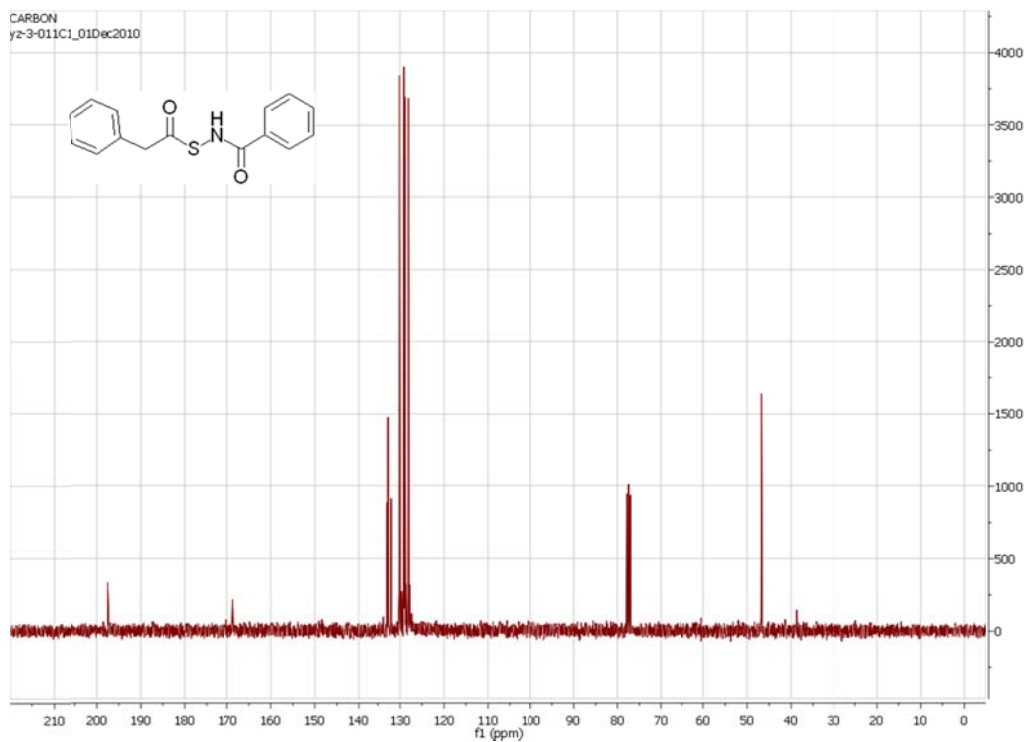

$^1\text{H}$  NMR (300 MHz,  $\text{CDCl}_3$ ) spectrum of **NSHD-19**

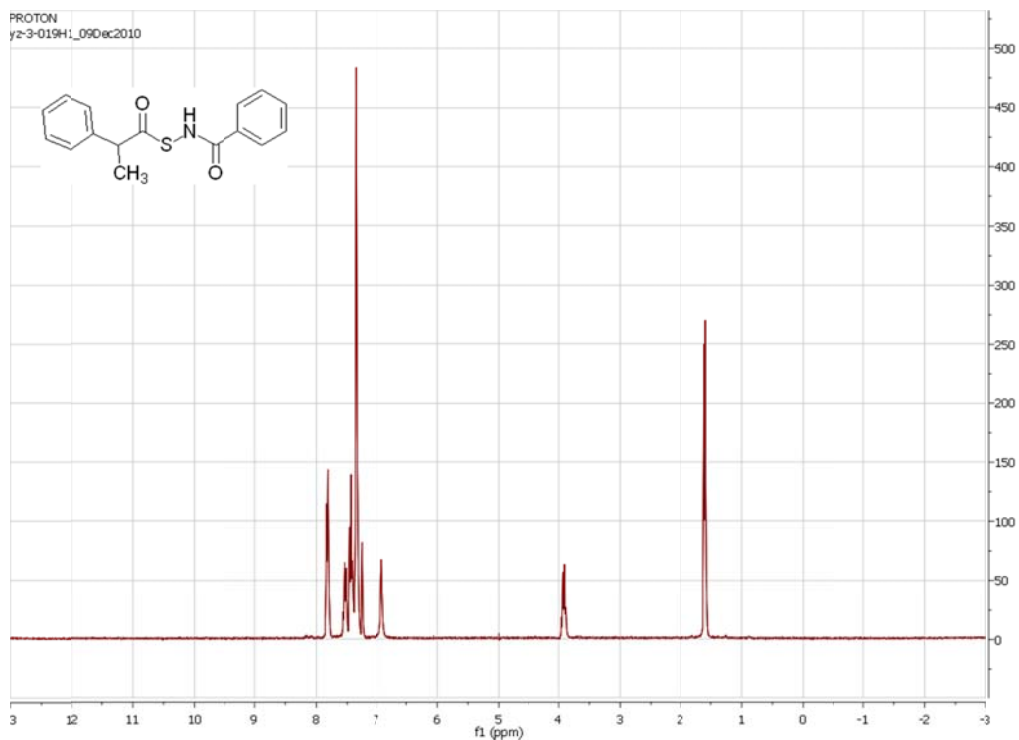

$^{13}\text{C}$  NMR (75 MHz,  $\text{CDCl}_3$ ) spectrum of **NSHD-19**

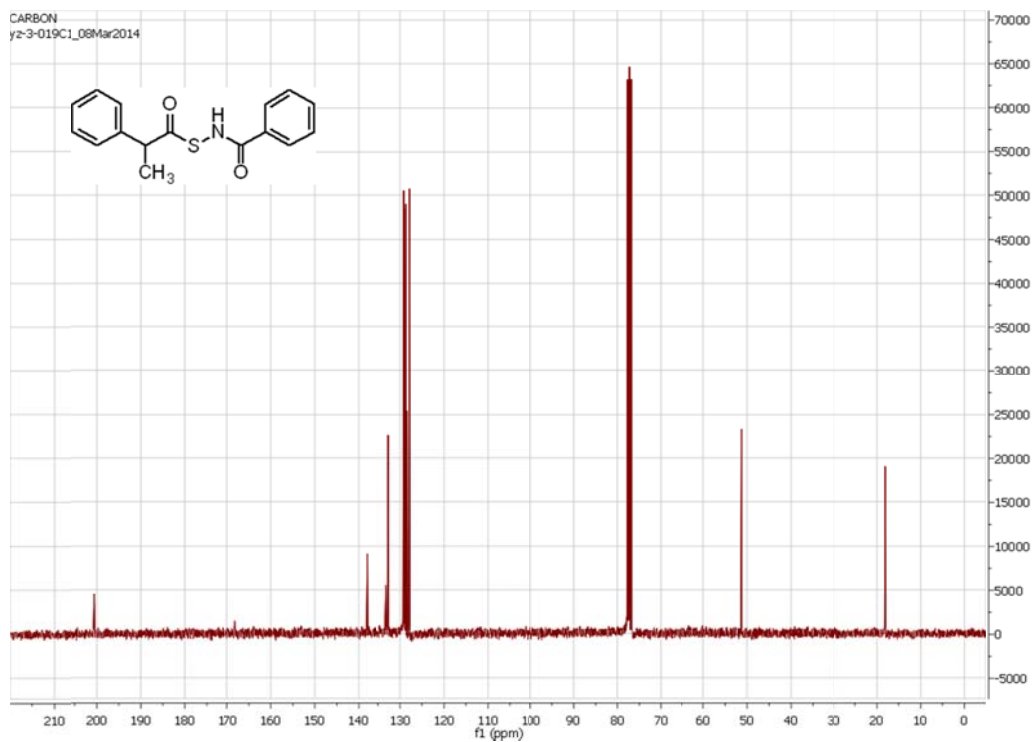

$^1\text{H}$  NMR (300 MHz,  $\text{CDCl}_3$ ) spectrum of **NSHD-20**

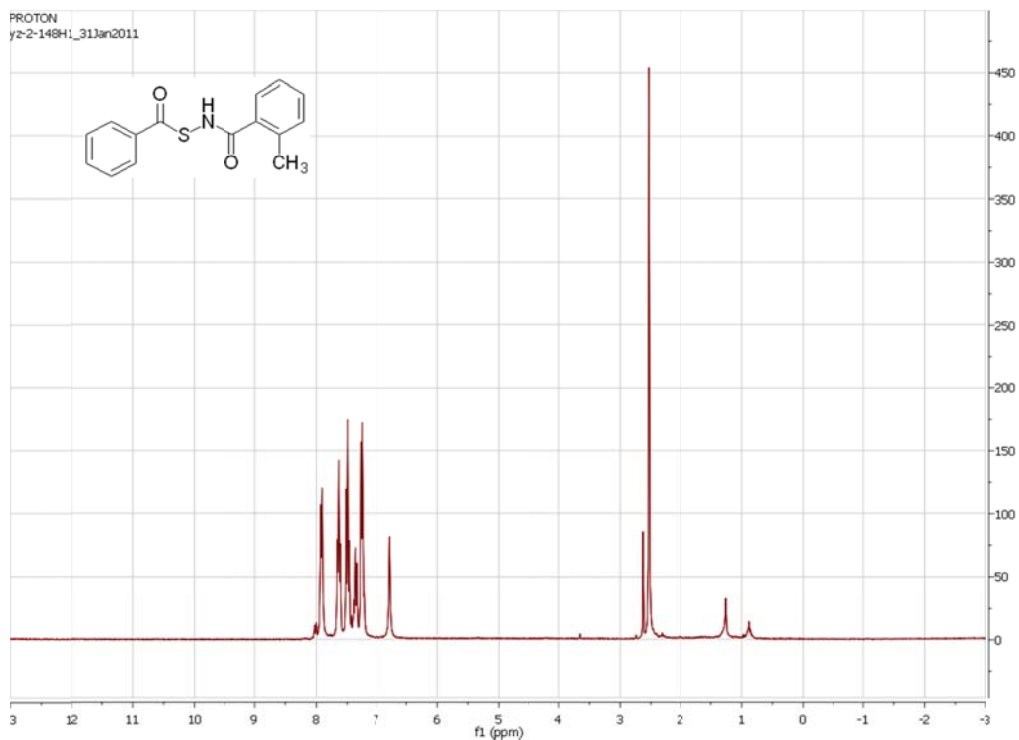

$^{13}\text{C}$  NMR (75 MHz,  $\text{CDCl}_3$ ) spectrum of **NSHD-20**

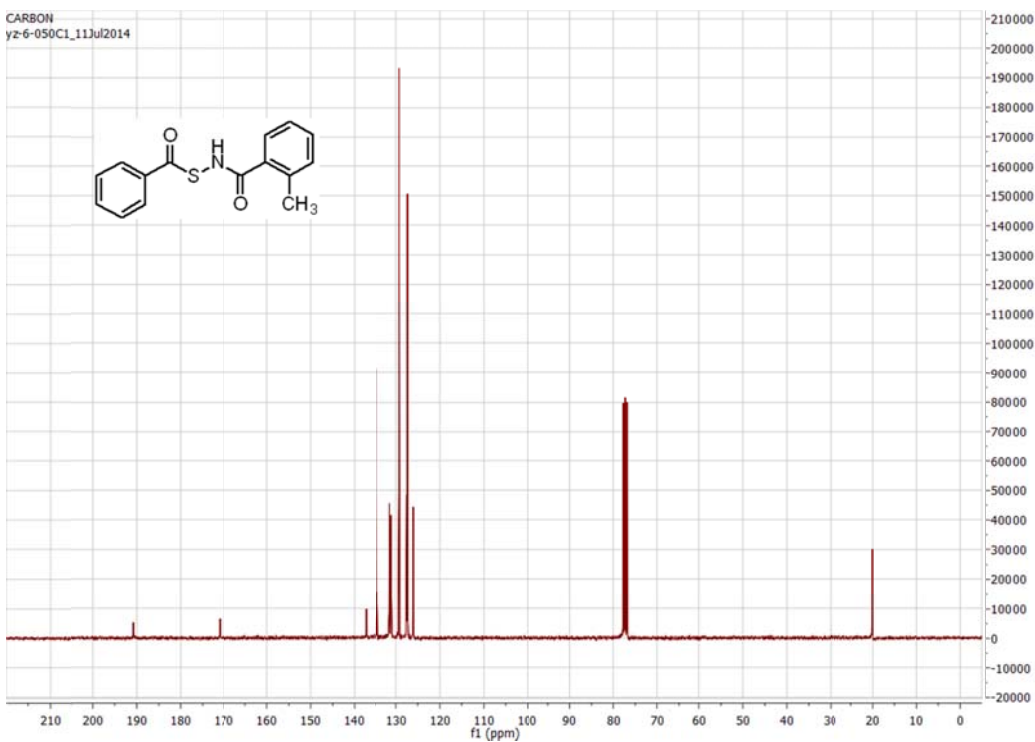

$^1\text{H}$  NMR (300 MHz,  $\text{CDCl}_3$ ) spectrum of **NSHD-21**

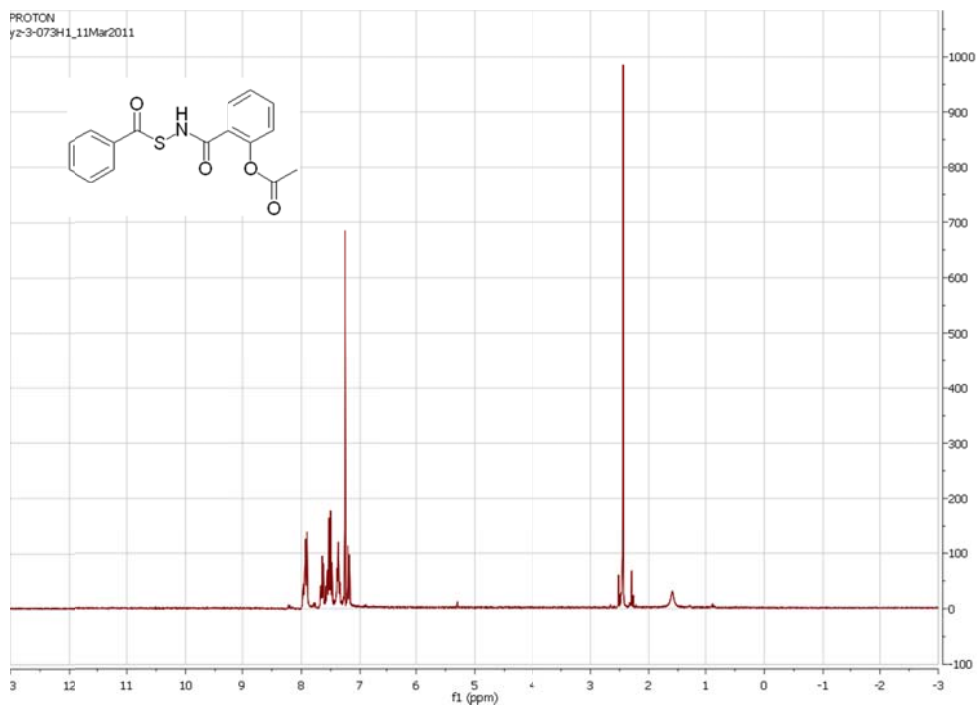

$^{13}\text{C}$  NMR (75 MHz,  $\text{CDCl}_3$ ) spectrum of **NSHD-21**

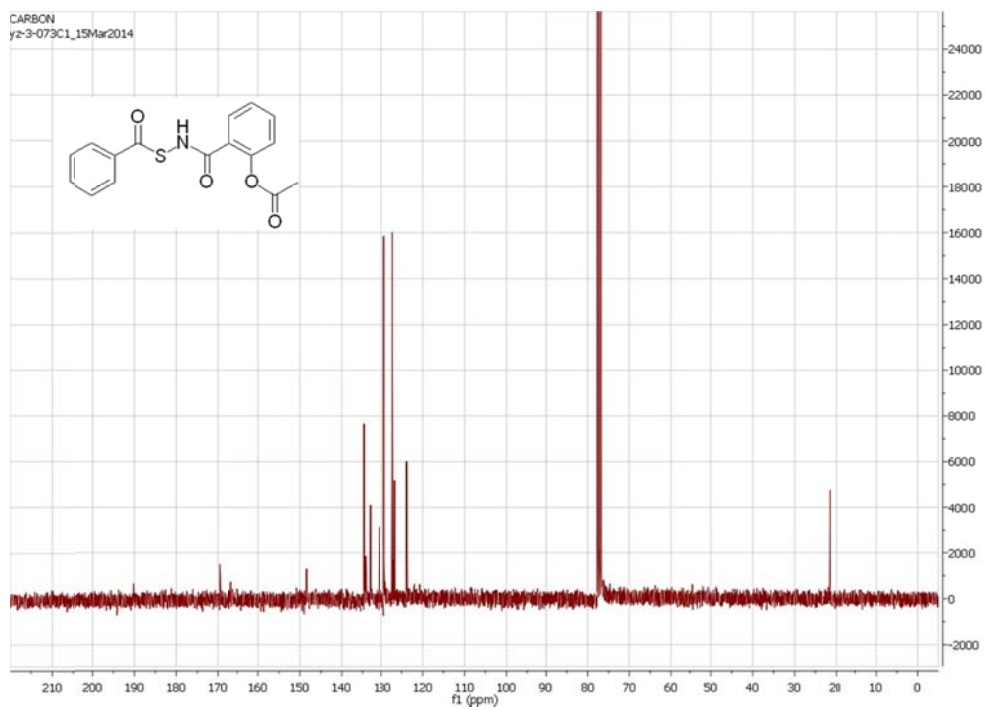

$^1\text{H}$  NMR (300 MHz,  $\text{CDCl}_3$ ) spectrum of **NSHD-22**

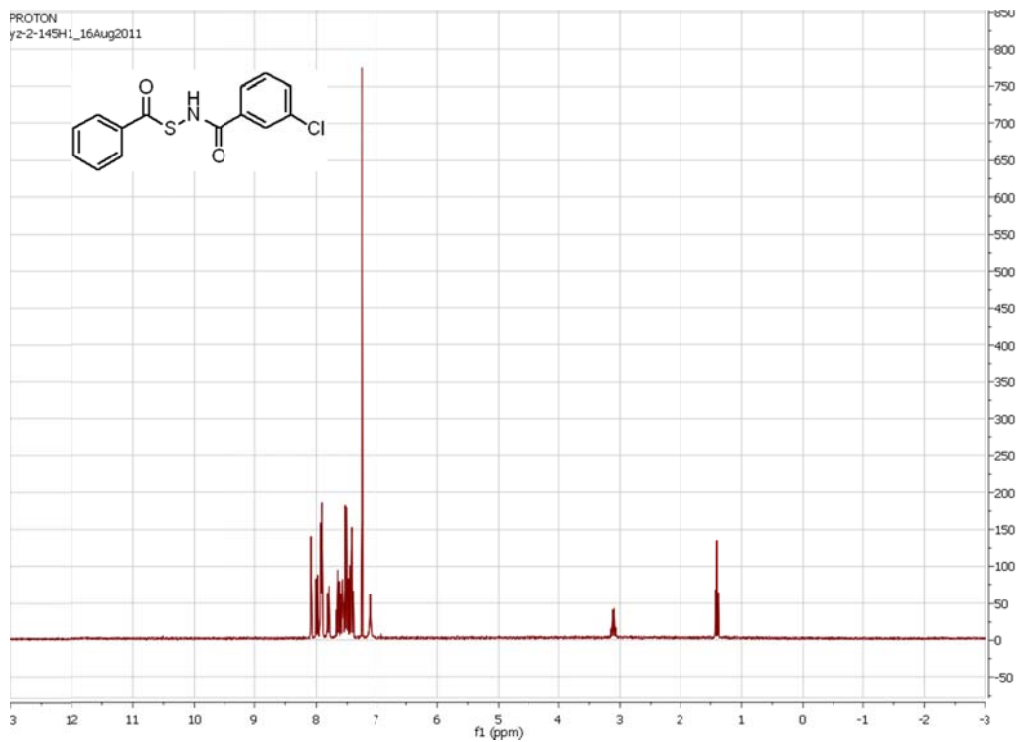

$^{13}\text{C}$  NMR (75 MHz,  $\text{CDCl}_3$ ) spectrum of **NSHD-22**

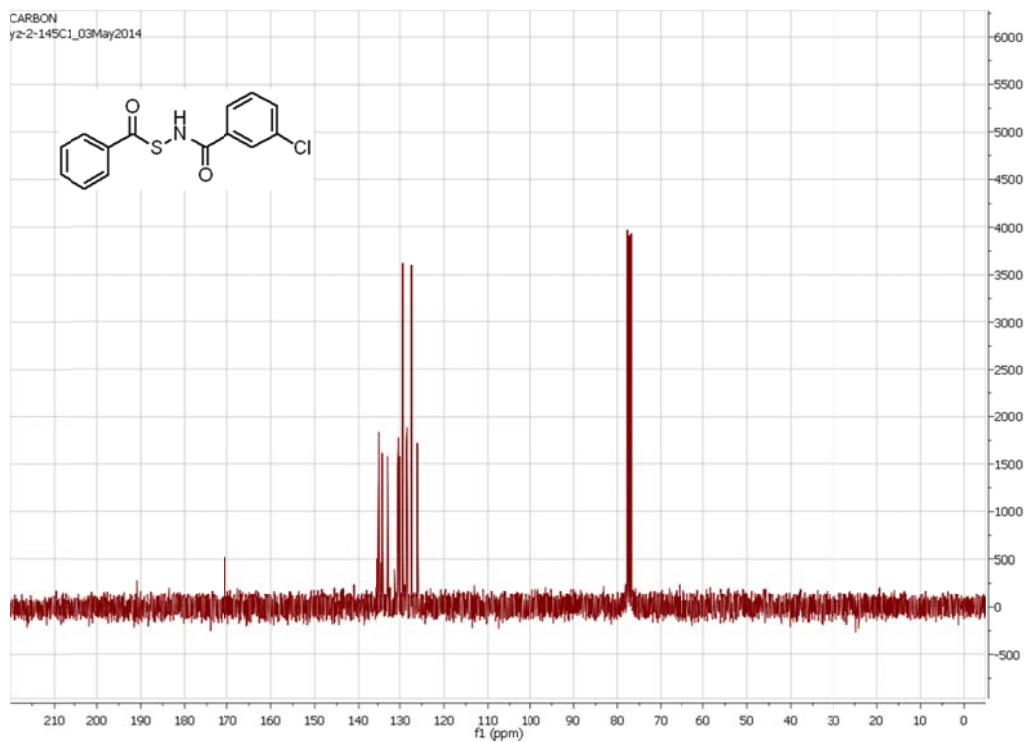



$^1\text{H}$  NMR (300 MHz,  $\text{CDCl}_3$ ) spectrum of **NSHD-23**

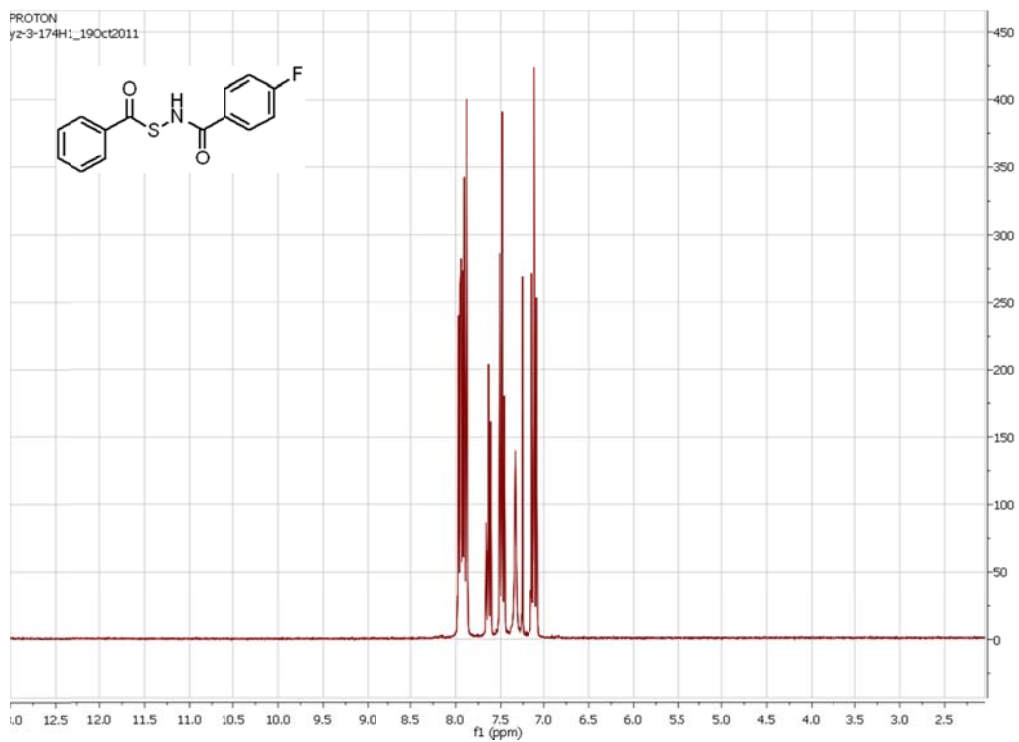

$^{13}\text{C}$  NMR (75 MHz,  $\text{CDCl}_3$ ) spectrum of **NSHD-23**

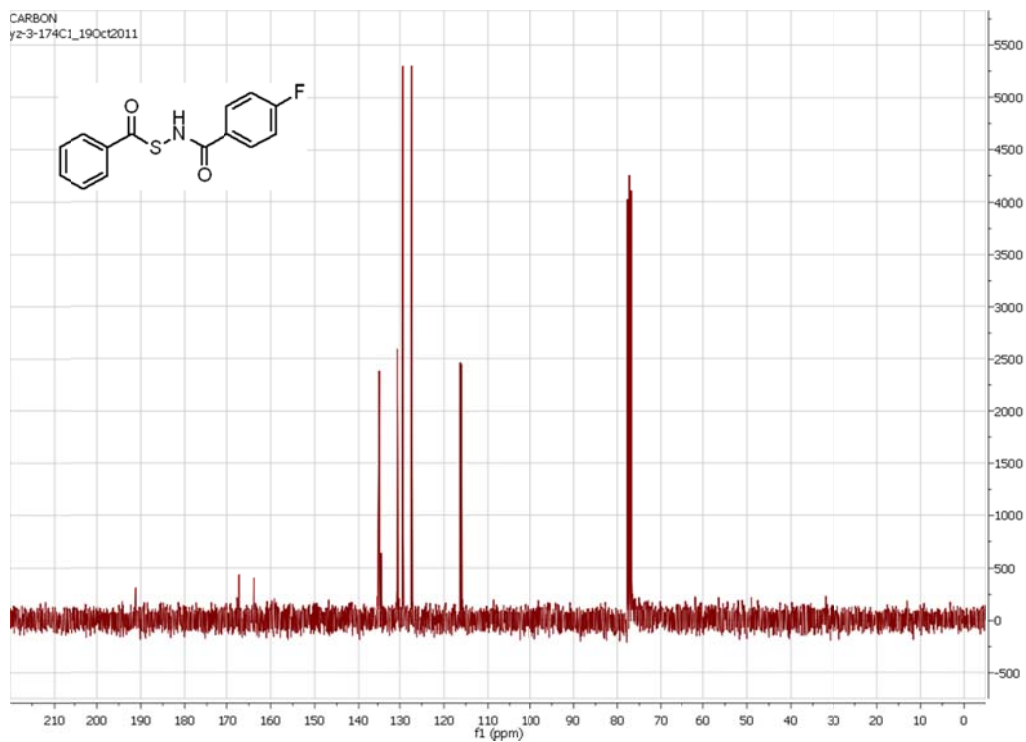

$^1\text{H}$  NMR (300 MHz,  $\text{CDCl}_3$ ) spectrum of **NSHD-24**

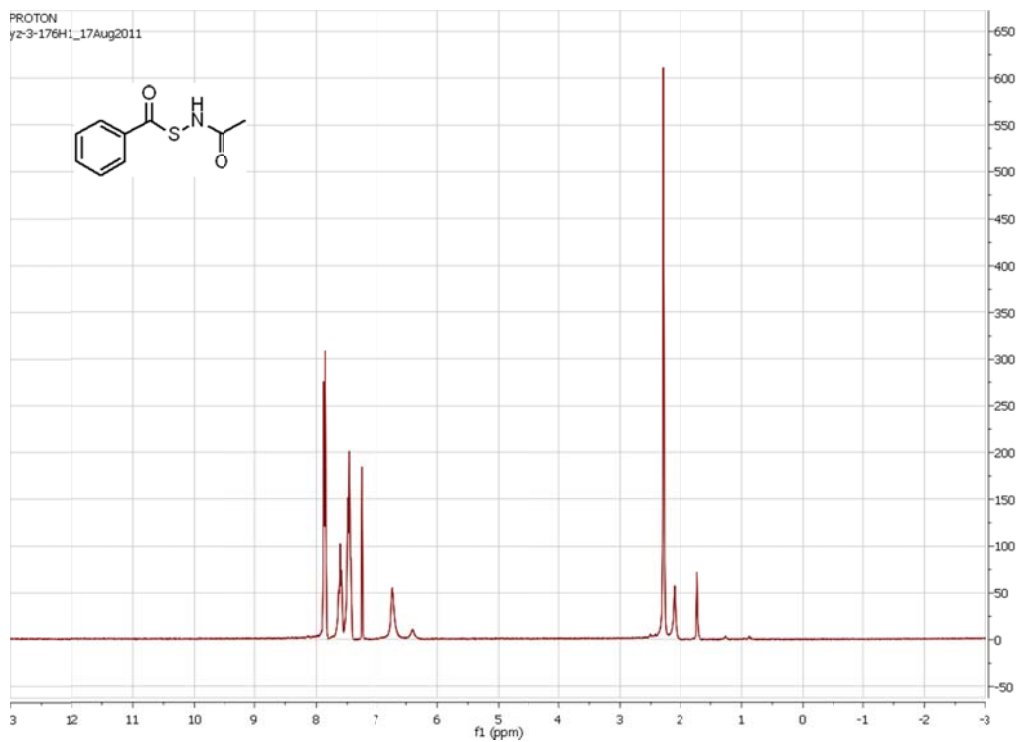

$^{13}\text{C}$  NMR (75 MHz,  $\text{CDCl}_3$ ) spectrum of **NSHD-24**

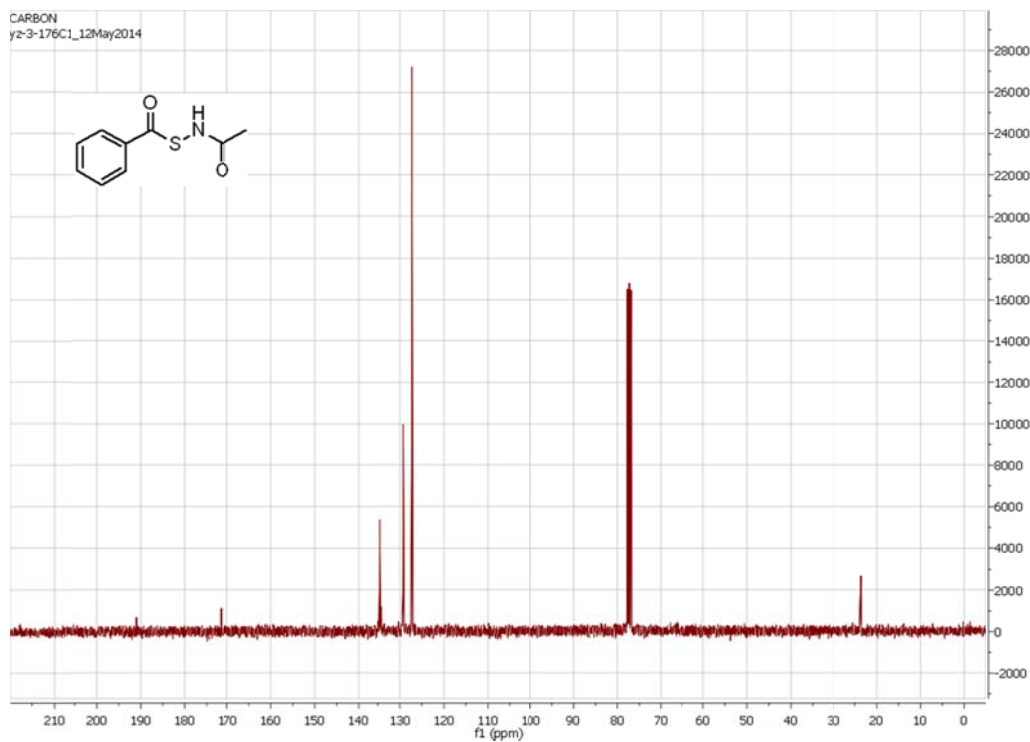

$^1\text{H}$  NMR (300 MHz,  $\text{CDCl}_3$ ) spectrum of **NSHD-25**

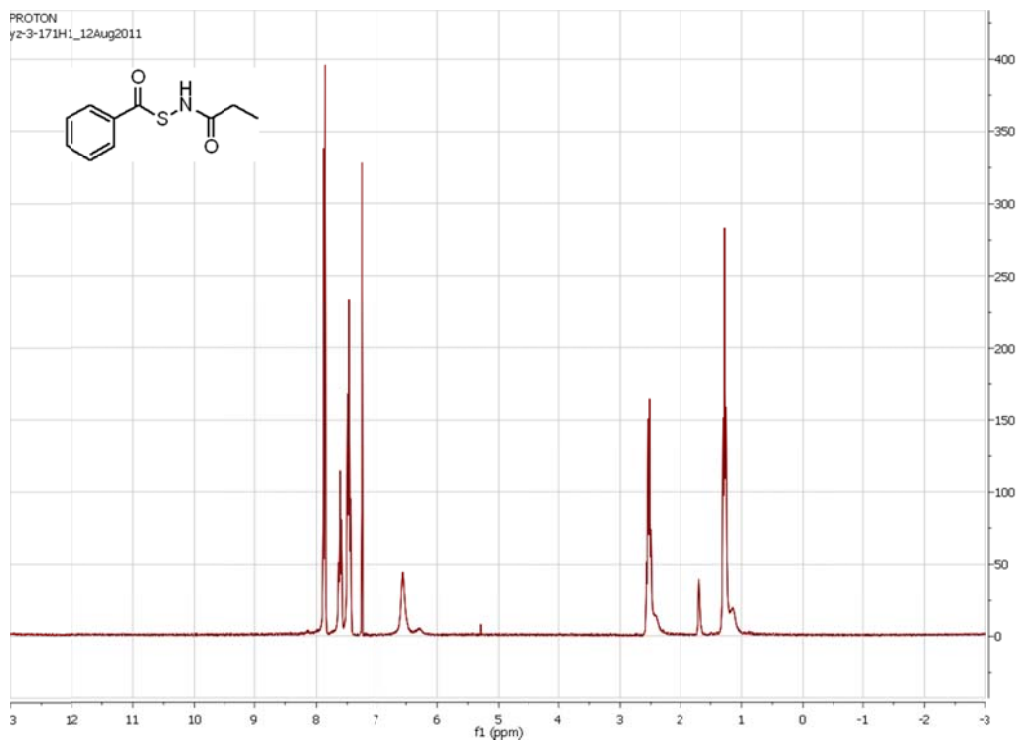

$^{13}\text{C}$  NMR (75 MHz,  $\text{CDCl}_3$ ) spectrum of **NSHD-25**

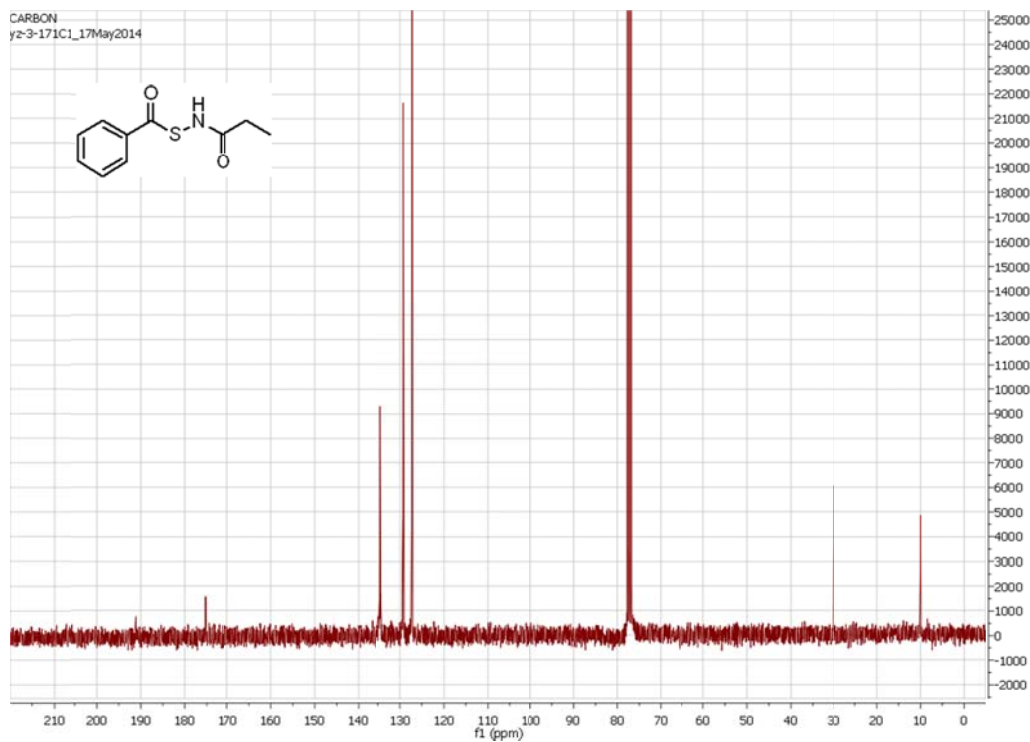

$^1\text{H}$  NMR (300 MHz,  $\text{CDCl}_3$ ) spectrum of **NSHD-26**

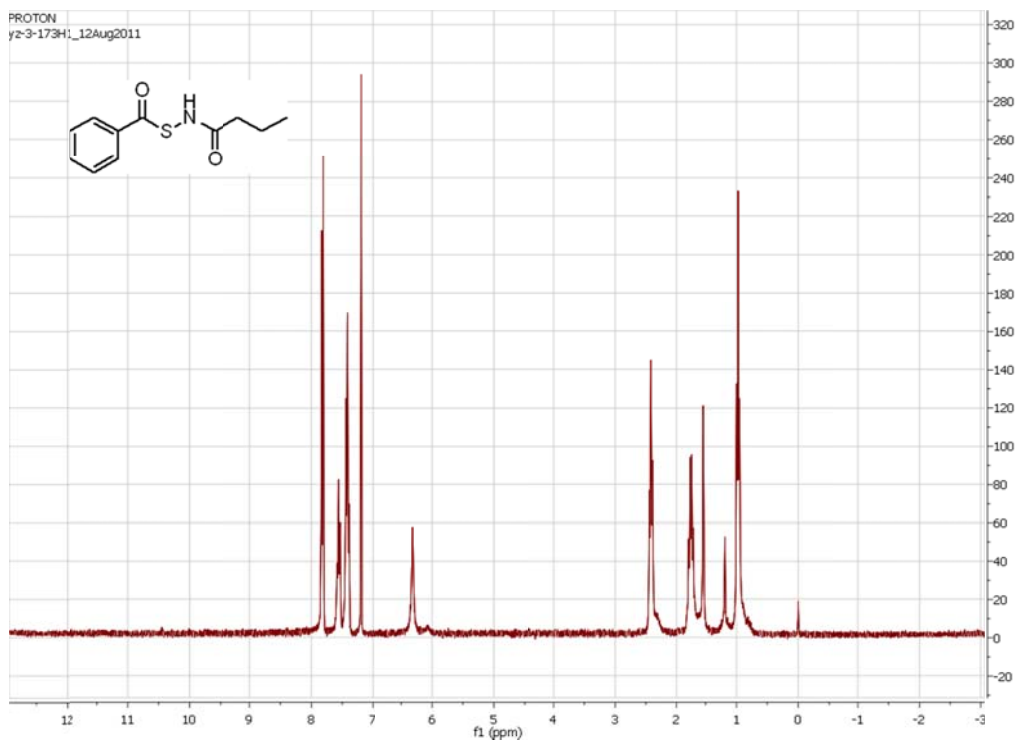

$^{13}\text{C}$  NMR (75 MHz,  $\text{CDCl}_3$ ) spectrum of **NSHD-26**

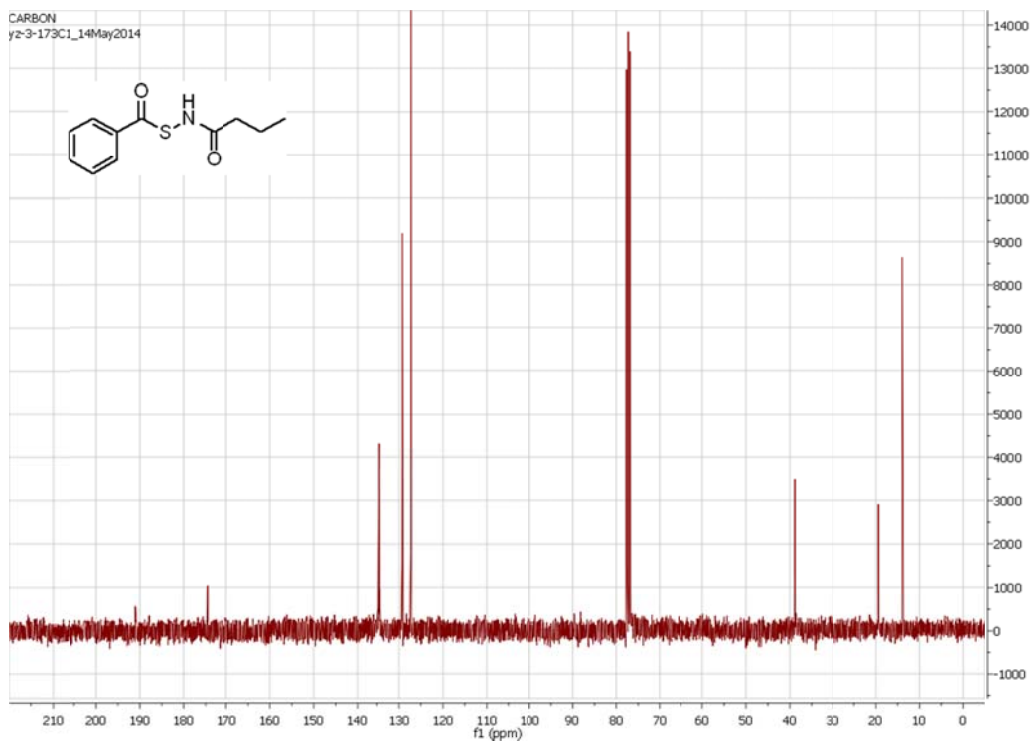

$^1\text{H}$  NMR (300 MHz,  $\text{DMSO-}d_6$ ) spectrum of **NSHD-27**

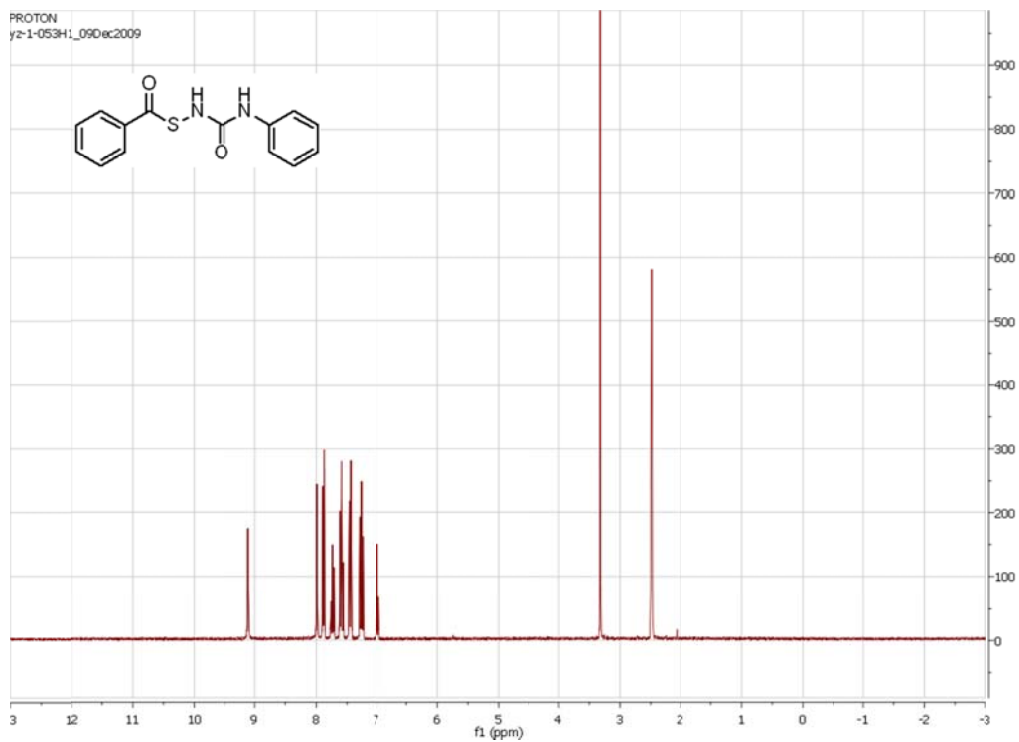

$^{13}\text{C}$  NMR (75 MHz,  $\text{DMSO-}d_6$ ) spectrum of **NSHD-27**

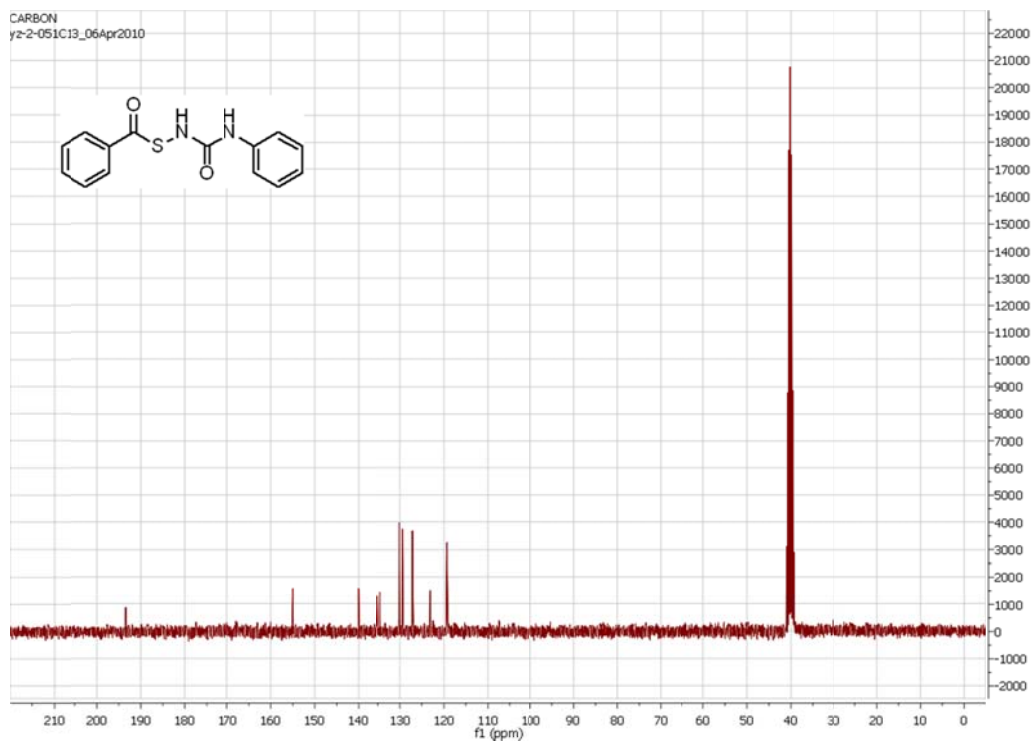

$^1\text{H}$  NMR (300 MHz,  $\text{DMSO-}d_6$ ) spectrum of **NSHD-28**

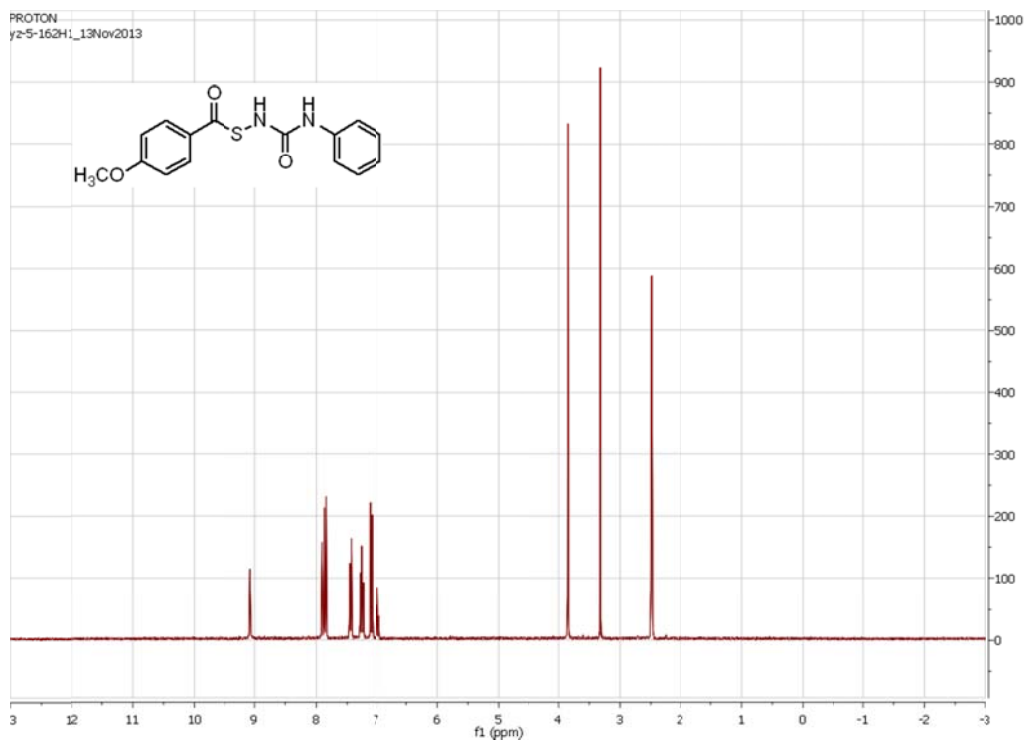

$^{13}\text{C}$  NMR (75 MHz,  $\text{DMSO-}d_6$ ) spectrum of **NSHD-28**

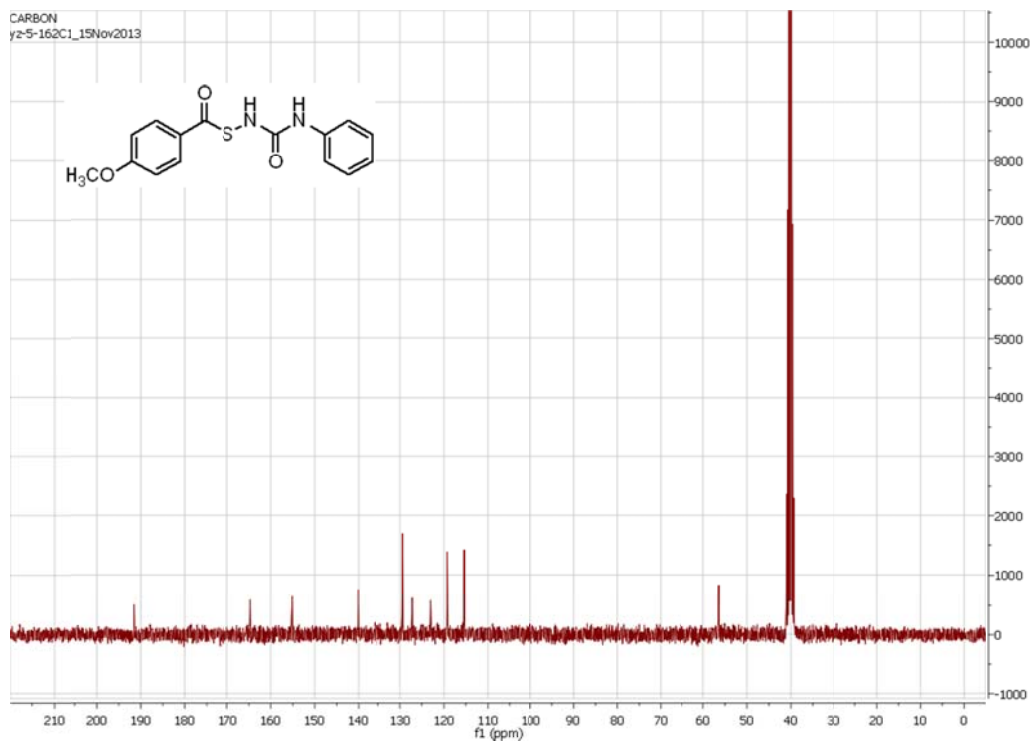

$^1\text{H}$  NMR (300 MHz,  $\text{DMSO-}d_6$ ) spectrum of **NSHD-29**

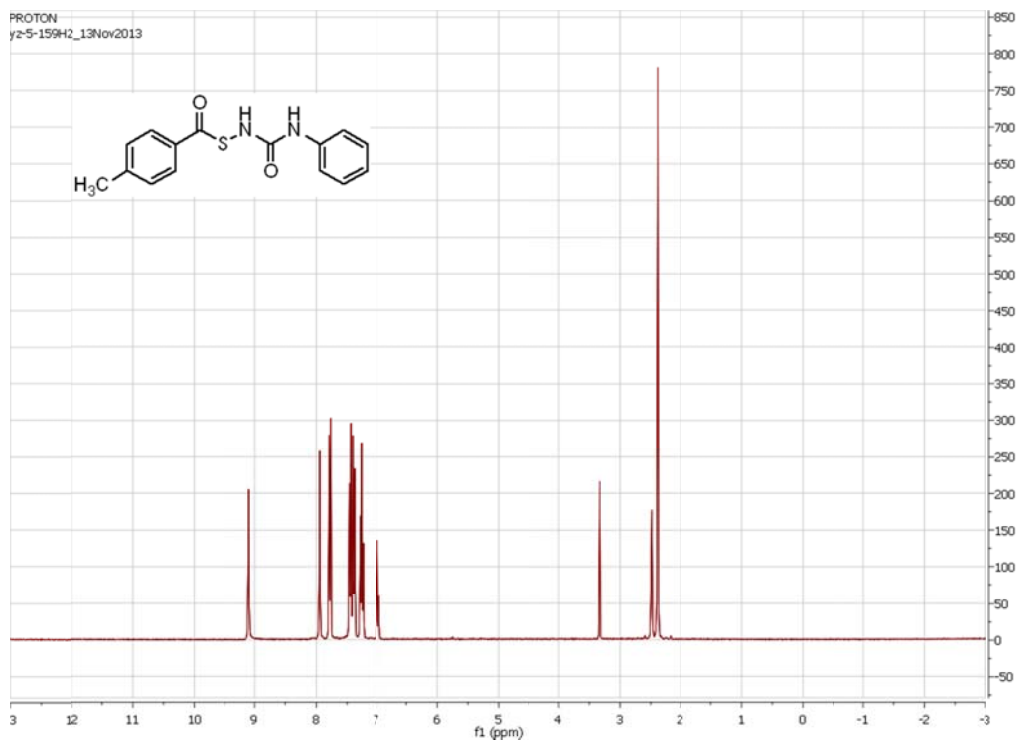

$^{13}\text{C}$  NMR (75 MHz,  $\text{DMSO-}d_6$ ) spectrum of **NSHD-29**

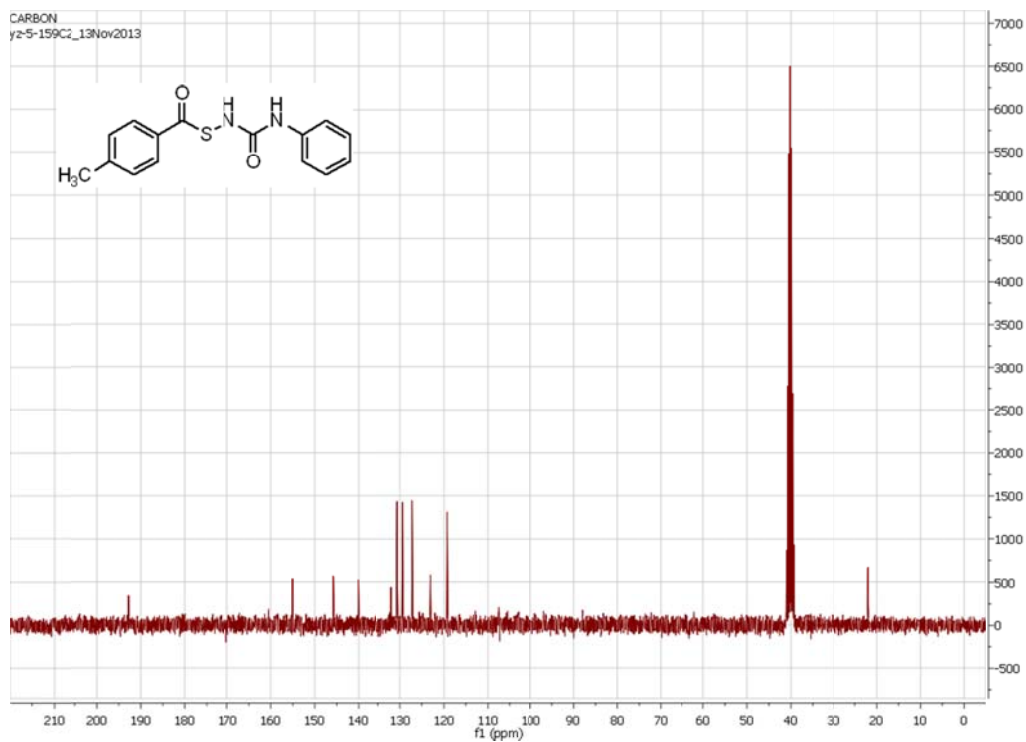

$^1\text{H}$  NMR (300 MHz,  $\text{DMSO-}d_6$ ) spectrum of **NSHD-30**

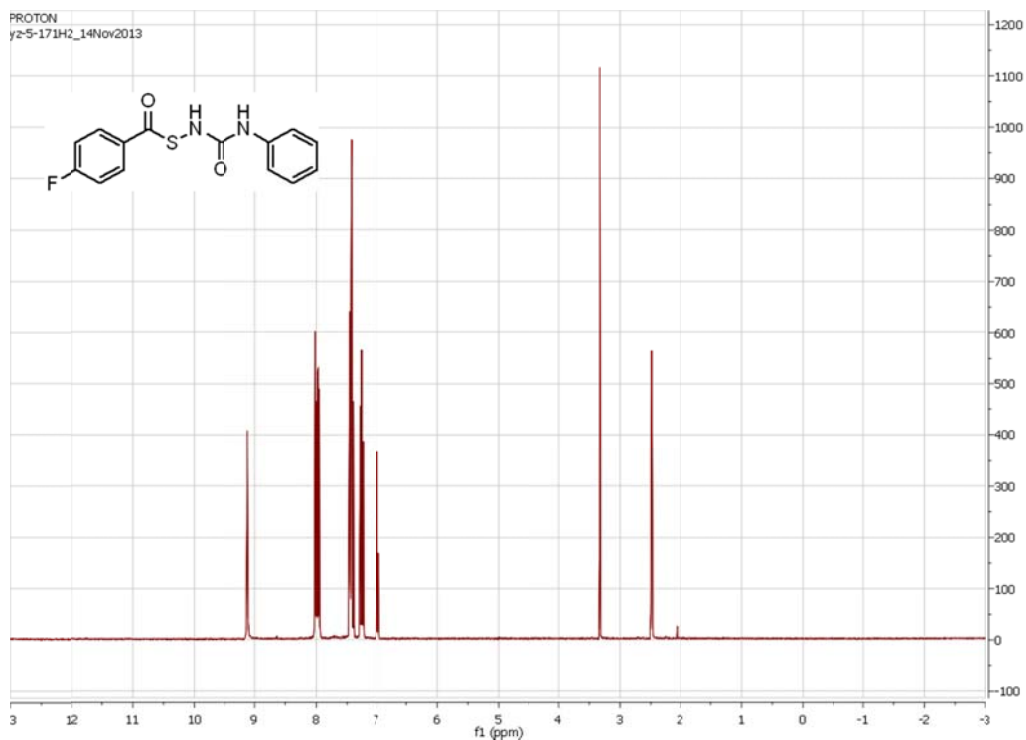

$^{13}\text{C}$  NMR (75 MHz,  $\text{DMSO-}d_6$ ) spectrum of **NSHD-30**

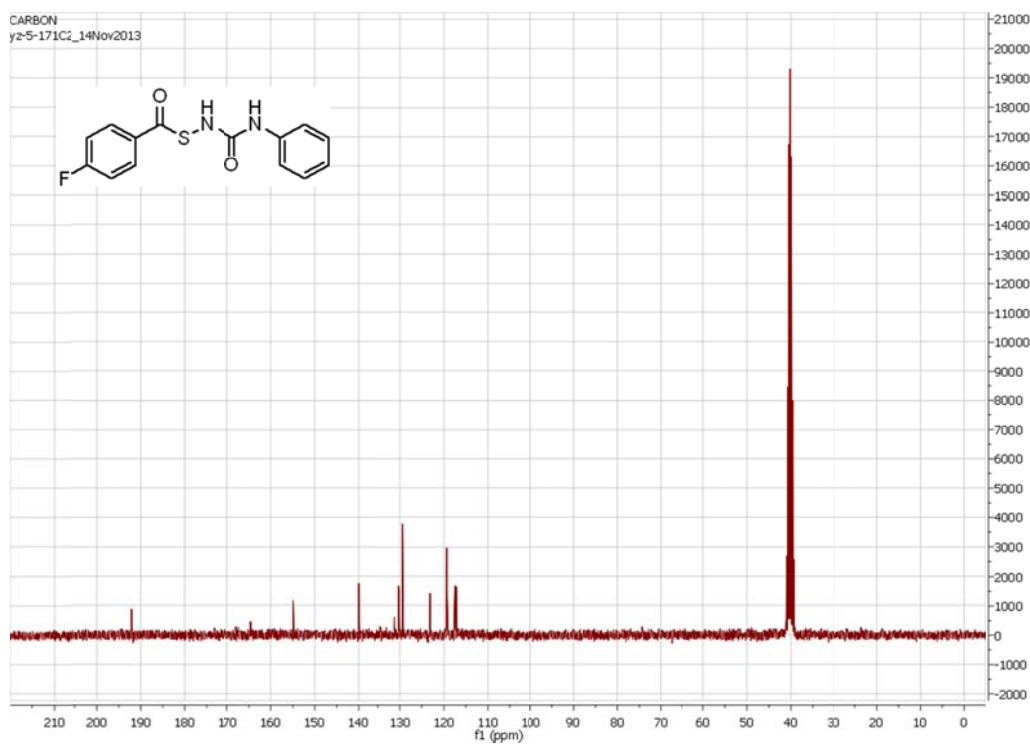



$^1\text{H}$  NMR (300 MHz,  $\text{DMSO-}d_6$ ) spectrum of **NSHD-31**

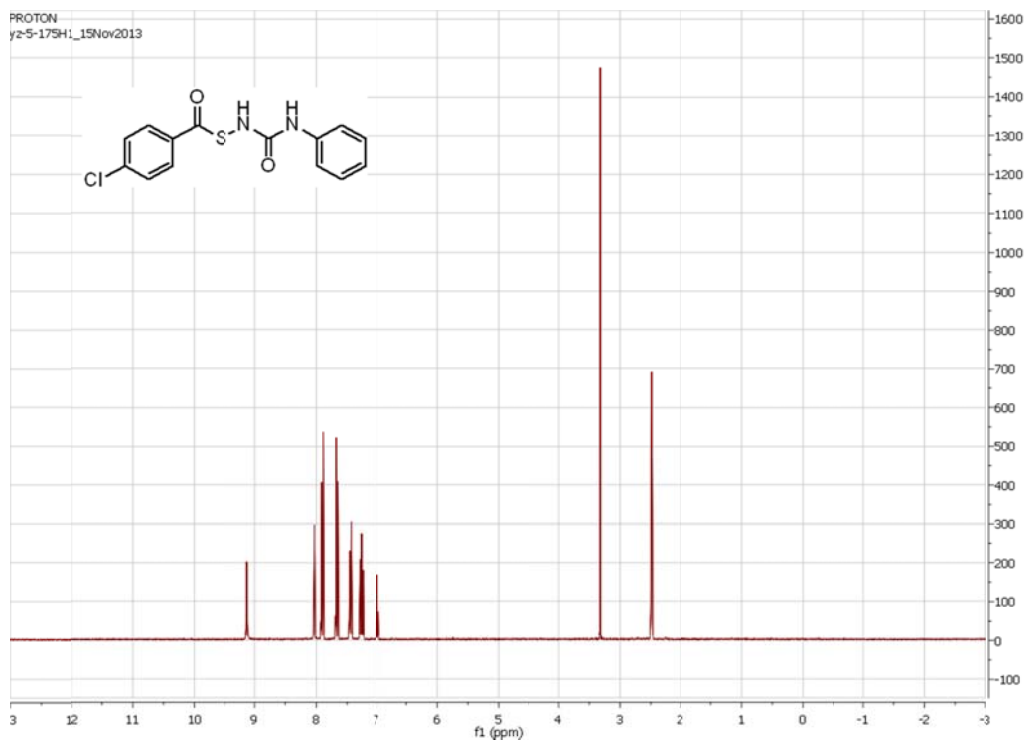

$^{13}\text{C}$  NMR (75 MHz,  $\text{DMSO-}d_6$ ) spectrum of **NSHD-31**

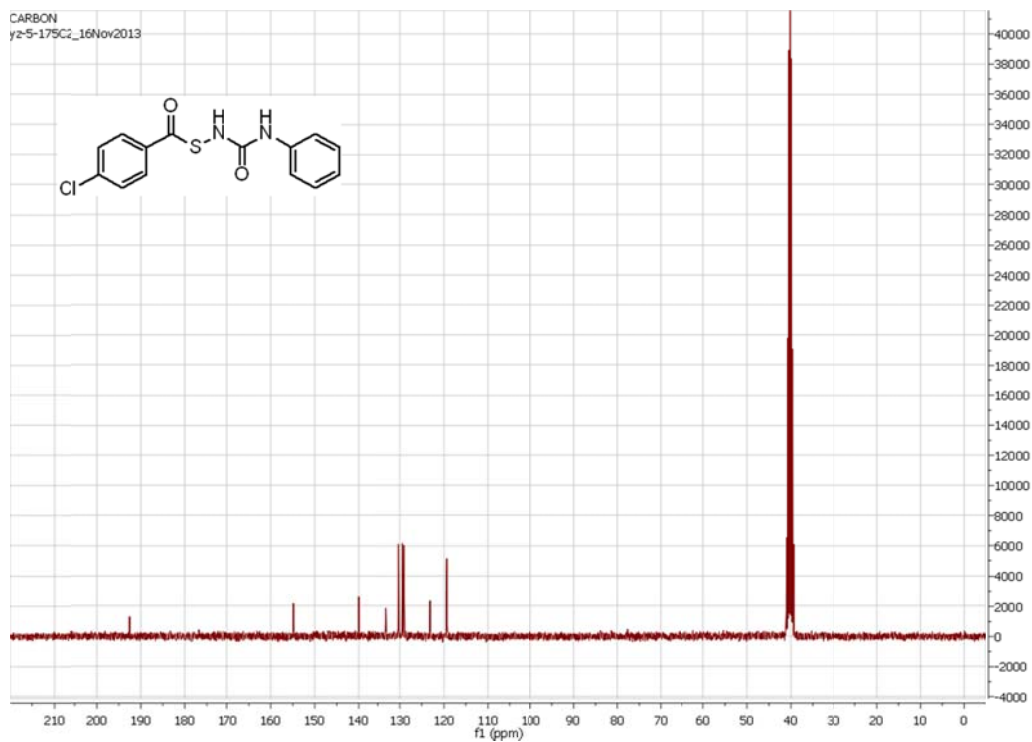

$^1\text{H}$  NMR (300 MHz,  $\text{DMSO-}d_6$ ) spectrum of **NSHD-32**

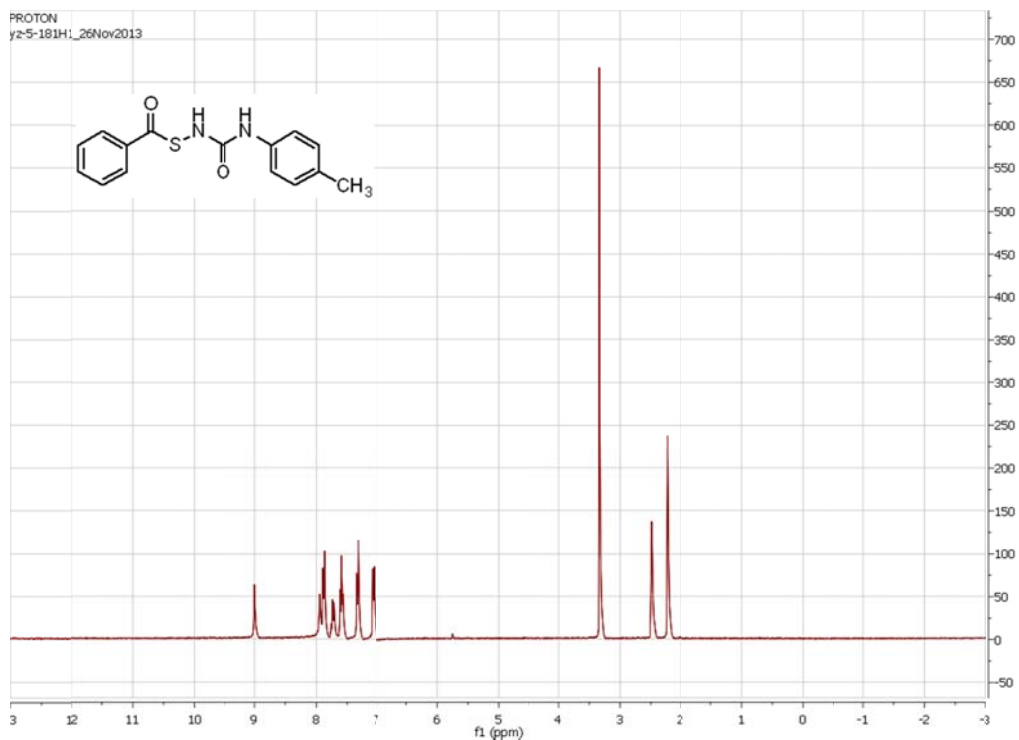

$^{13}\text{C}$  NMR (75 MHz,  $\text{DMSO-}d_6$ ) spectrum of **NSHD-32**

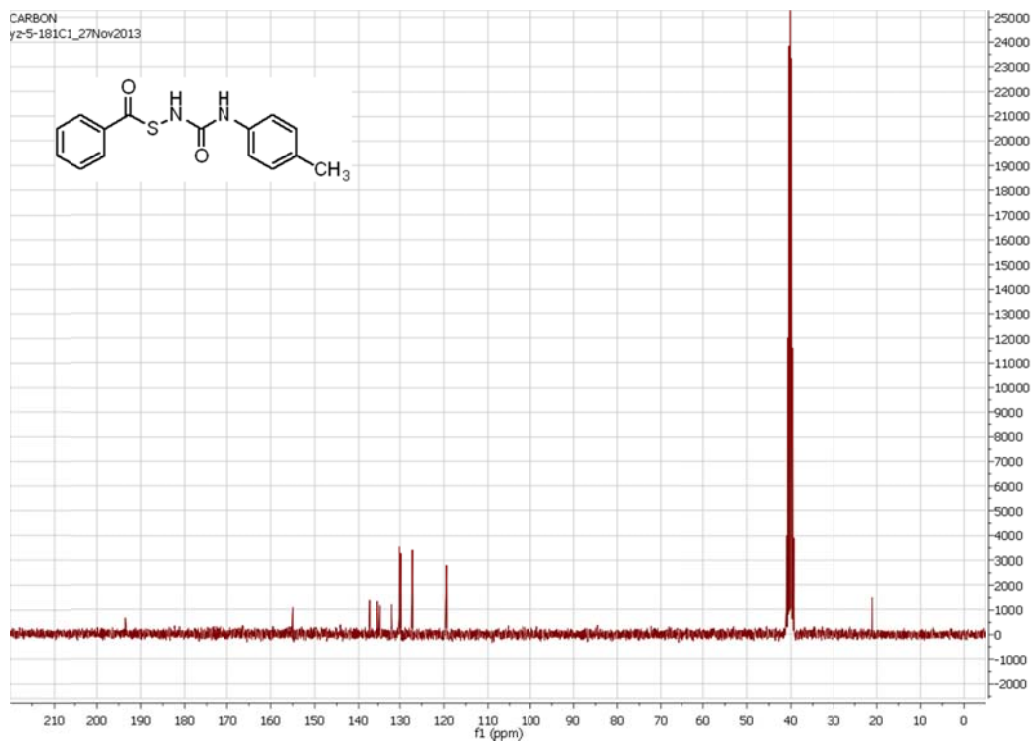

$^1\text{H}$  NMR (300 MHz,  $\text{DMSO-}d_6$ ) spectrum of **NSHD-33**

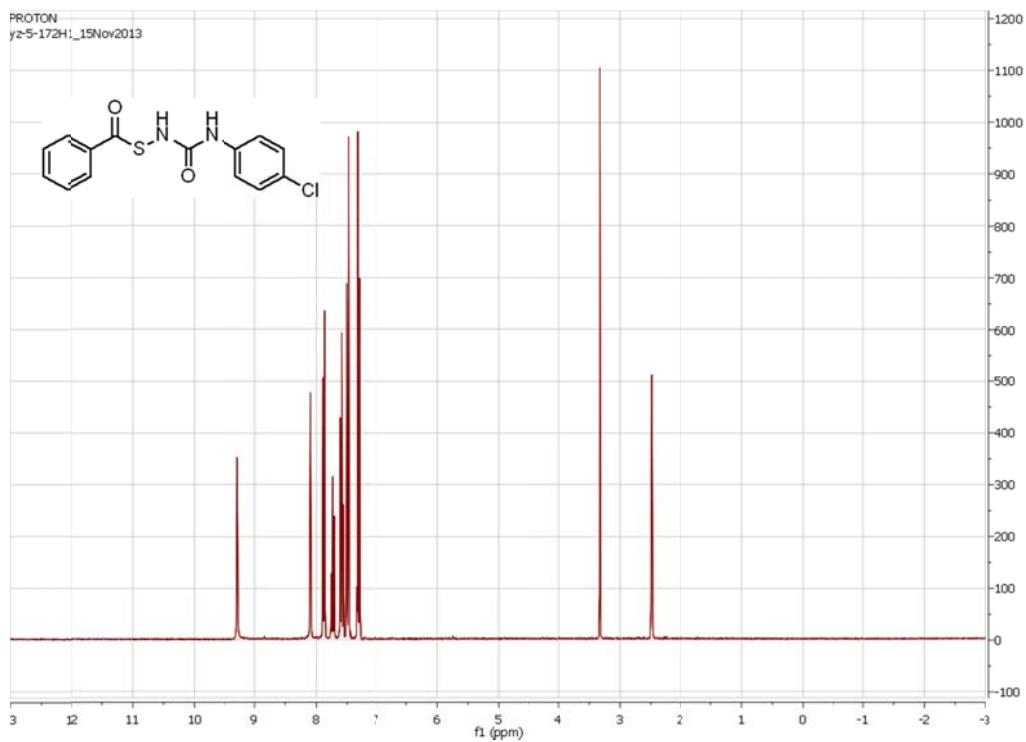

$^{13}\text{C}$  NMR (75 MHz,  $\text{DMSO-}d_6$ ) spectrum of **NSHD-33**

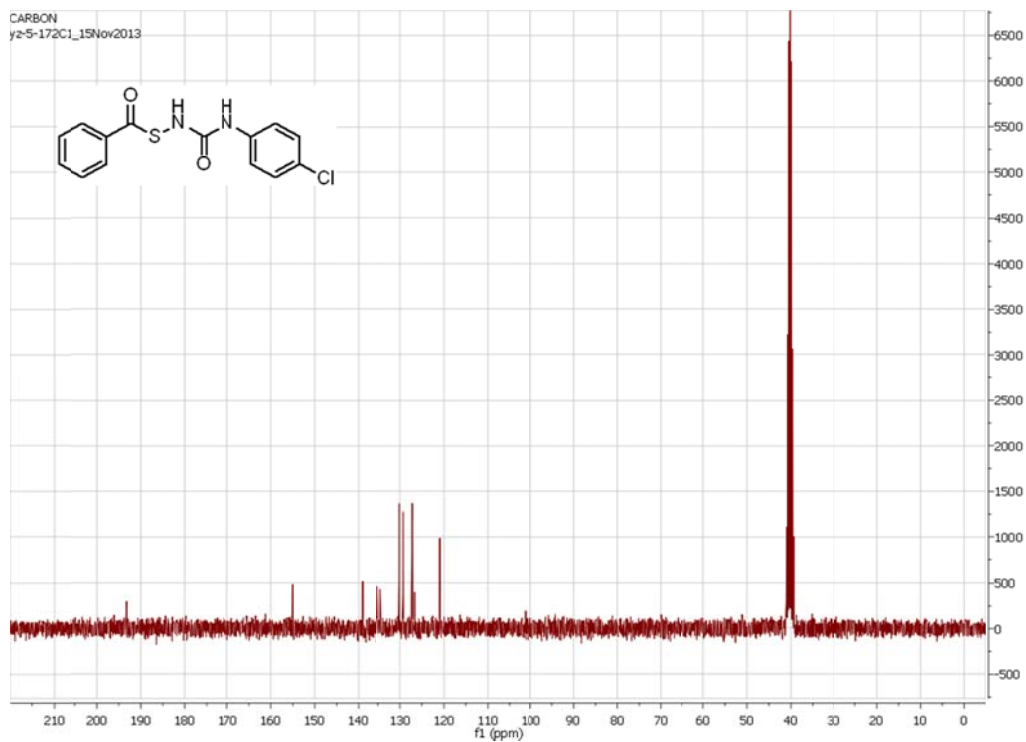

Supplement: jm5b01033_si_001.pdf [file jm5b01033_si_001.pdf]
